# Supplementary material for: Important contributions of non-fossil fuel nitrogen oxides emissions
Source: PubMed Central journal article supplement (PMC7801390; doi:10.1038/s41467-020-20356-0), 2021-01-11
Supplement: 41467_2020_20356_MOESM1_ESM.pdf [file 41467_2020_20356_MOESM1_ESM.pdf]

## Supplementary Information for

### Important contributions of non-fossil fuel nitrogen oxides emissions

Wei Song<sup>1</sup>, Xue-Yan Liu<sup>1</sup>, Chao-Chen Hu<sup>1</sup>, Guan-Yi Chen<sup>2</sup>, Xue-Jun Liu<sup>3</sup>, Wendell W. Walters<sup>4</sup>, Greg Michalski<sup>5</sup>, Cong-Qiang Liu<sup>1</sup>

1. School of Earth System Science, Tianjin University, Tianjin, 300072, China

2. Georgia Tech Shenzhen Institute, Tianjin University, Shenzhen 518071, China

3. College of Resources and Environmental Sciences, China Agricultural University, Beijing, 100193, China

4. Institute at Brown for Environment and Society, Brown University, 85 Waterman St, Providence, RI, 02912, United States

5. Department of Earth, Atmospheric, and Planetary Sciences, Purdue University, 550 Stadium Mall Drive, West Lafayette, IN 47907, United States

#### Materials & Correspondence.

Correspondence and requests for materials should be addressed to Xue-Yan Liu (liuxueyan@tju.edu.cn).

#### This file includes:

##### 1. Supplementary Figs. 1–14

##### 2. Supplementary Tables. 1–3

##### 3. Supplementary Note 1:

- 1) Supplementary references 21–148 in Supplementary Text 1 are publications of  $\delta^{15}\text{N}_{\text{w-NO}_3^-}$  observations.
- 2) Supplementary references 149–154 in Supplementary Text 2 are publications of simultaneous observations of  $\text{HNO}_3$ ,  $\text{p-NO}_3^-$ , and  $\text{NO}_2$  concentrations in the atmosphere.
- 3) Supplementary references 155–157 in Supplementary Text 3 are data sources of observations of  $\text{HNO}_3$ ,  $\text{p-NO}_3^-$ , and  $\text{NO}_2$  concentrations in the ambient atmosphere.
- 4) Supplementary references 158–165 in Supplementary Text 4 are publications of observations of ambient  $f_{\text{NO}_2/\text{NO}_x}$  values.
- 5) Supplementary references 166–169 in Supplementary Text 5 are publications of ambient  $\delta^{15}\text{N}_{\text{NO}_x}$  observations.
- 6) Supplementary references 170–173 in Supplementary Text 6 are publications of simultaneous  $\delta^{15}\text{N}$  observations of  $\text{HNO}_3$ ,  $\text{p-NO}_3^-$ , and  $\text{w-NO}_3^-$  in the atmosphere.
- 7) Supplementary references 174–182 in Supplementary Text 7 are publications of ambient  $\delta^{15}\text{N}_{\text{HNO}_3}$  observations.
- 8) Supplementary references 183–213 in Supplementary Text 8 are publications of  $\delta^{15}\text{N}_{\text{p-NO}_3^-}$  observations.

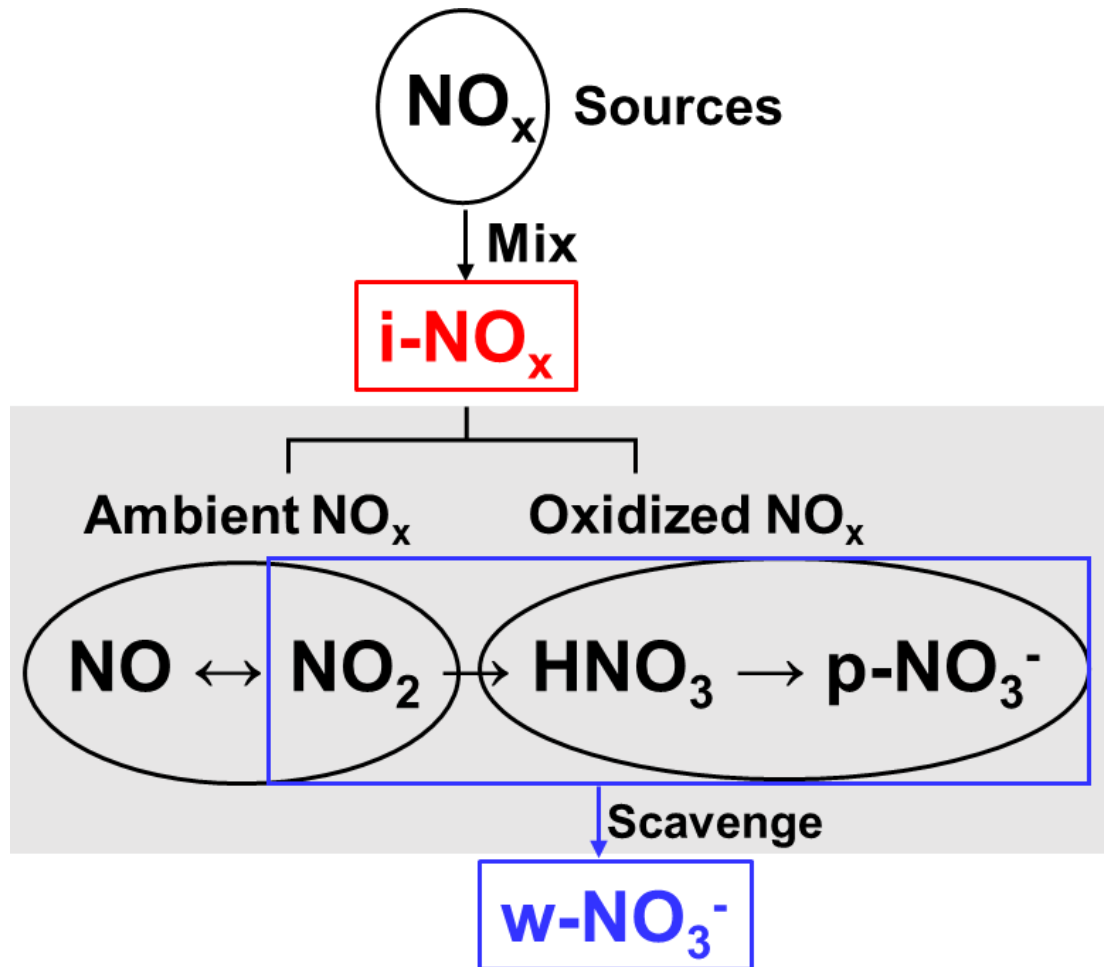

45

46 **Supplementary Fig. 1 | A schematic map showing relationships between NO<sub>x</sub>,**

47 **HNO<sub>3</sub>, p-NO<sub>3</sub><sup>-</sup>, and w-NO<sub>3</sub><sup>-</sup> in the atmosphere (detailed in Methods).**

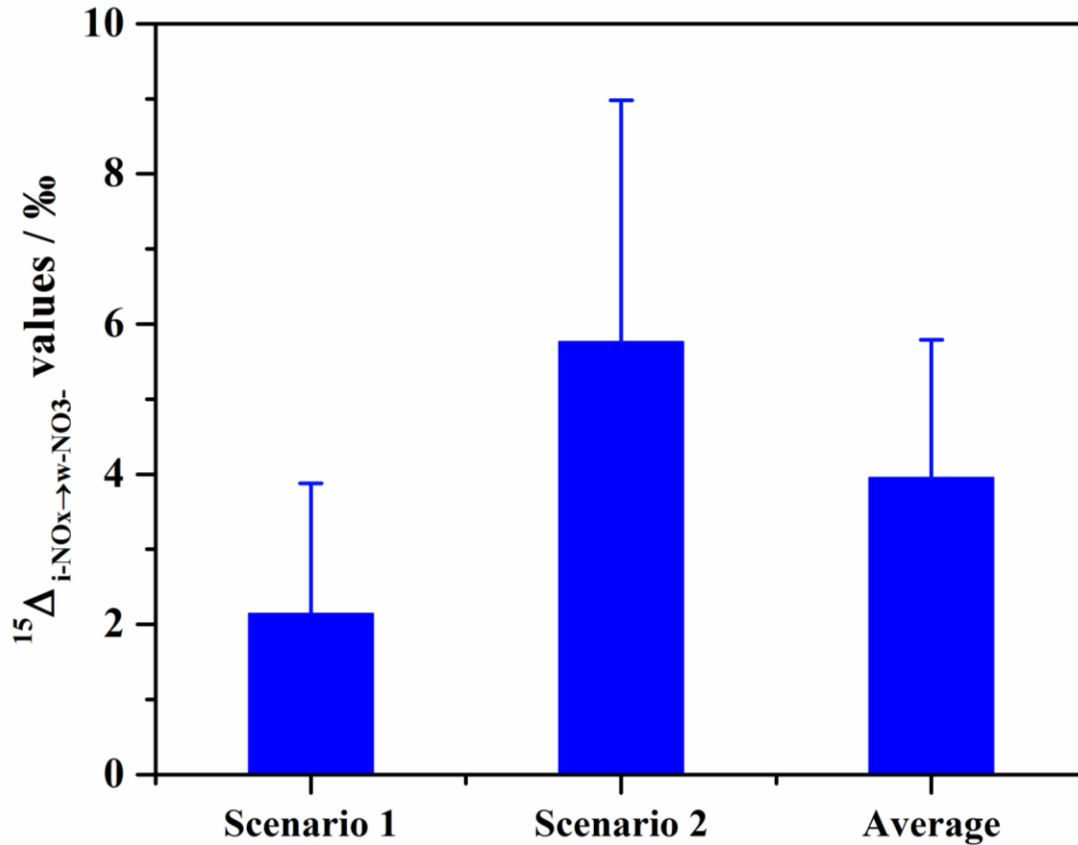

48

49 **Supplementary Fig. 2 | Differences in  $\delta^{15}N$  values between  $w-NO_3^-$  and  $i-NO_x$  in**  
 50 **the atmosphere ( $^{15}\Delta_{i-NO_x \rightarrow w-NO_3^-}$  values). Mean  $\pm$ SD values are shown. Scenarios 1**  
 51 **& 2 show estimations based on simultaneous and non-synchronous observations of**  
 52 **atmospheric  $NO_x$ ,  $HNO_3$ ,  $p-NO_3^-$ , and  $w-NO_3^-$  (detailed in Methods). Average: the**  
 53 **mean value of mean values of Scenarios 1 & 2.**

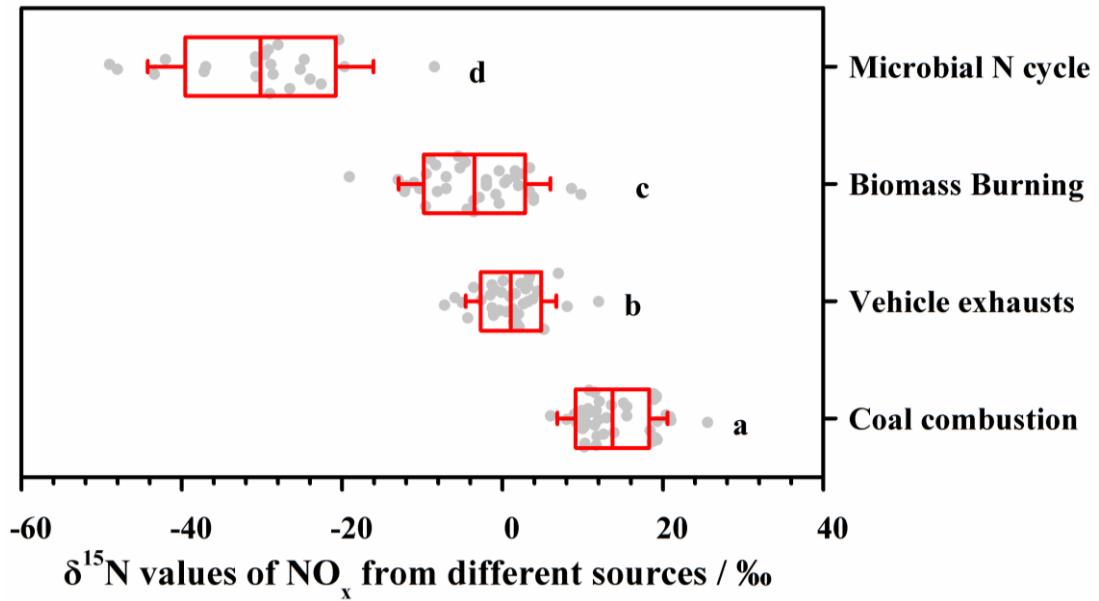

54

55 **Supplementary Fig. 3** |  $\delta^{15}\text{N}$  values of  $\text{NO}_x$  from major sources. Dots around each  
 56 box show scatter values. The box encompasses the 25<sup>th</sup>–75<sup>th</sup> percentiles, whiskers and  
 57 line in each box are the SD and mean values, respectively. Values with different  
 58 letters are significantly different at P<0.05. Data were cited from refs. 1–9.

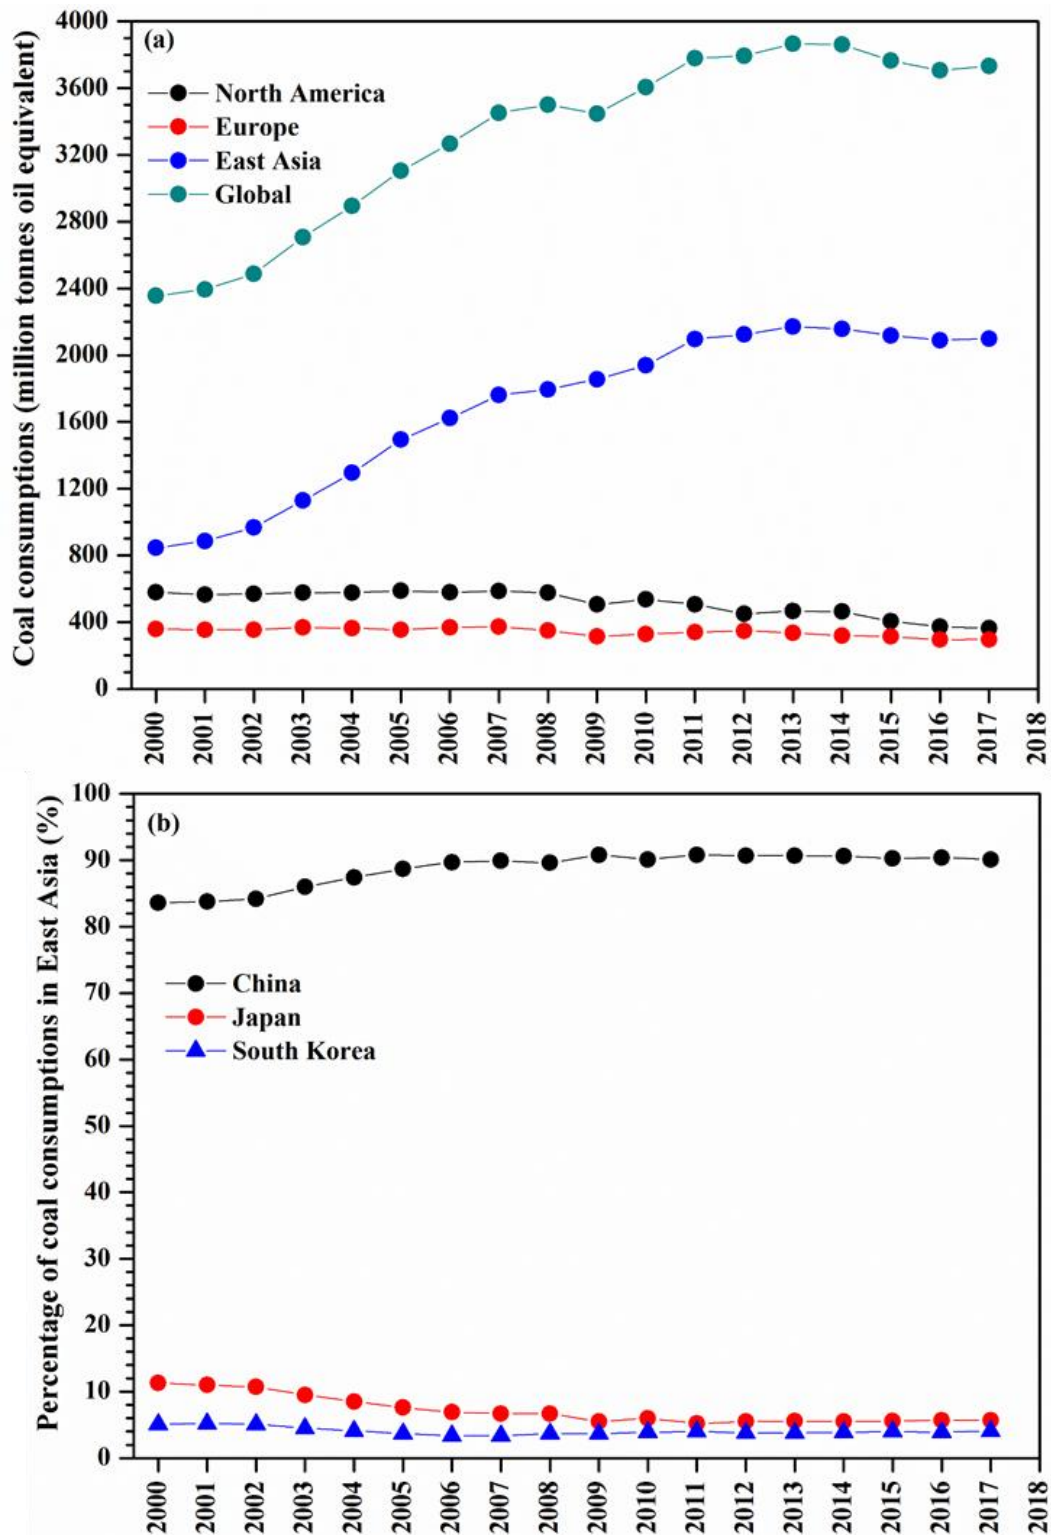

59  
60 **Supplementary Fig. 4 | (a) Coal consumptions in East Asia, Europe, North**  
61 **America, and global between 2000–2017. Data were downloaded from ref. 10. (b)**  
62 **Percentages of coal consumptions in China, Japan, and South Korea in the total**  
63 **amount of East Asia during 2000–2017. Data were downloaded from ref. 10.**  
64

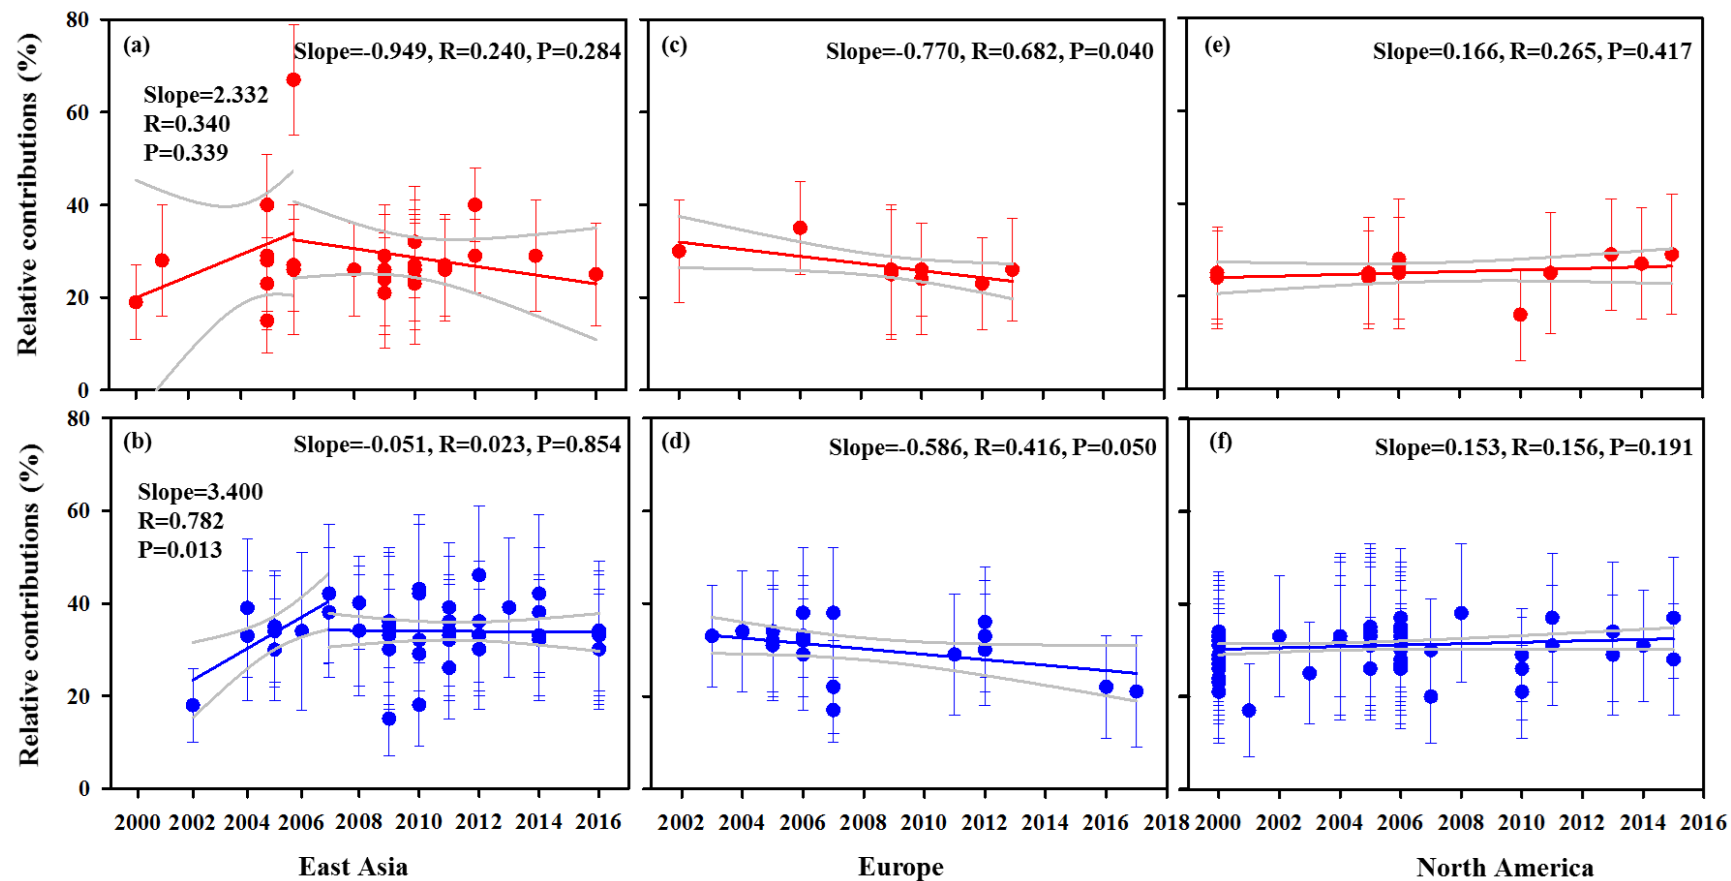

65

66 **Supplementary Fig. 5 | Variations of relative contributions of NO<sub>x</sub> from coal combustion during 2000–2017 at urban (a, c, and e) and**  
 67 **non-urban (b, d, and f) sites of East Asia, Europe, and North America, respectively.** Mean  $\pm$ SD values of relative contributions at each site  
 68 in each year are shown ( $n=28, 9, 13$  for panels a, c, e and  $n=47, 21, 88$  for panels b, d, f, respectively). Calculations were detailed in Methods.  
 69 The gray lines were the 95% confidence intervals.

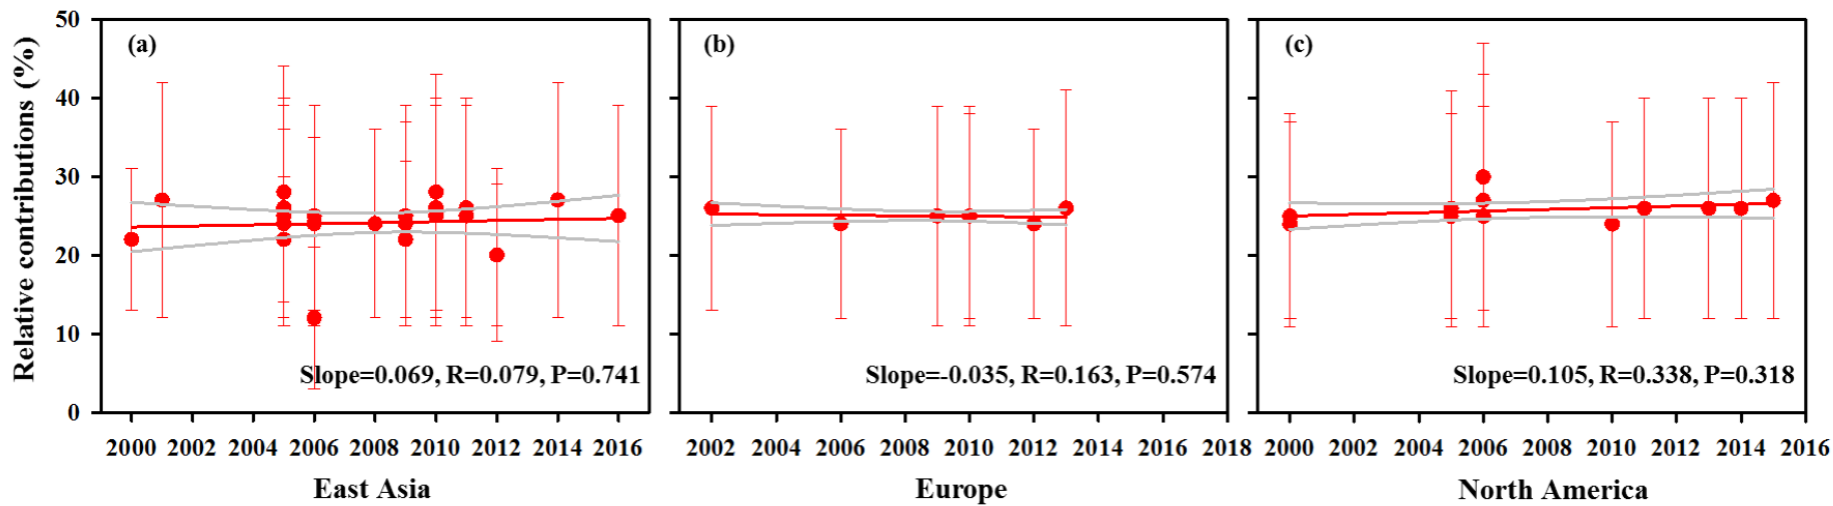

70

71 **Supplementary Fig. 6 | Variations of relative contributions of NO<sub>x</sub> from vehicle exhausts during 2000–2017 at urban (a, b, and c) sites of**  
 72 **East Asia, Europe, and North America, respectively.** Mean ±SD values of relative contributions at each site in each year are shown ( $n=28, 9,$   
 73  $13$  for panels a, b, and c, respectively). Calculations were detailed in Methods. The gray lines were the 95% confidence intervals.

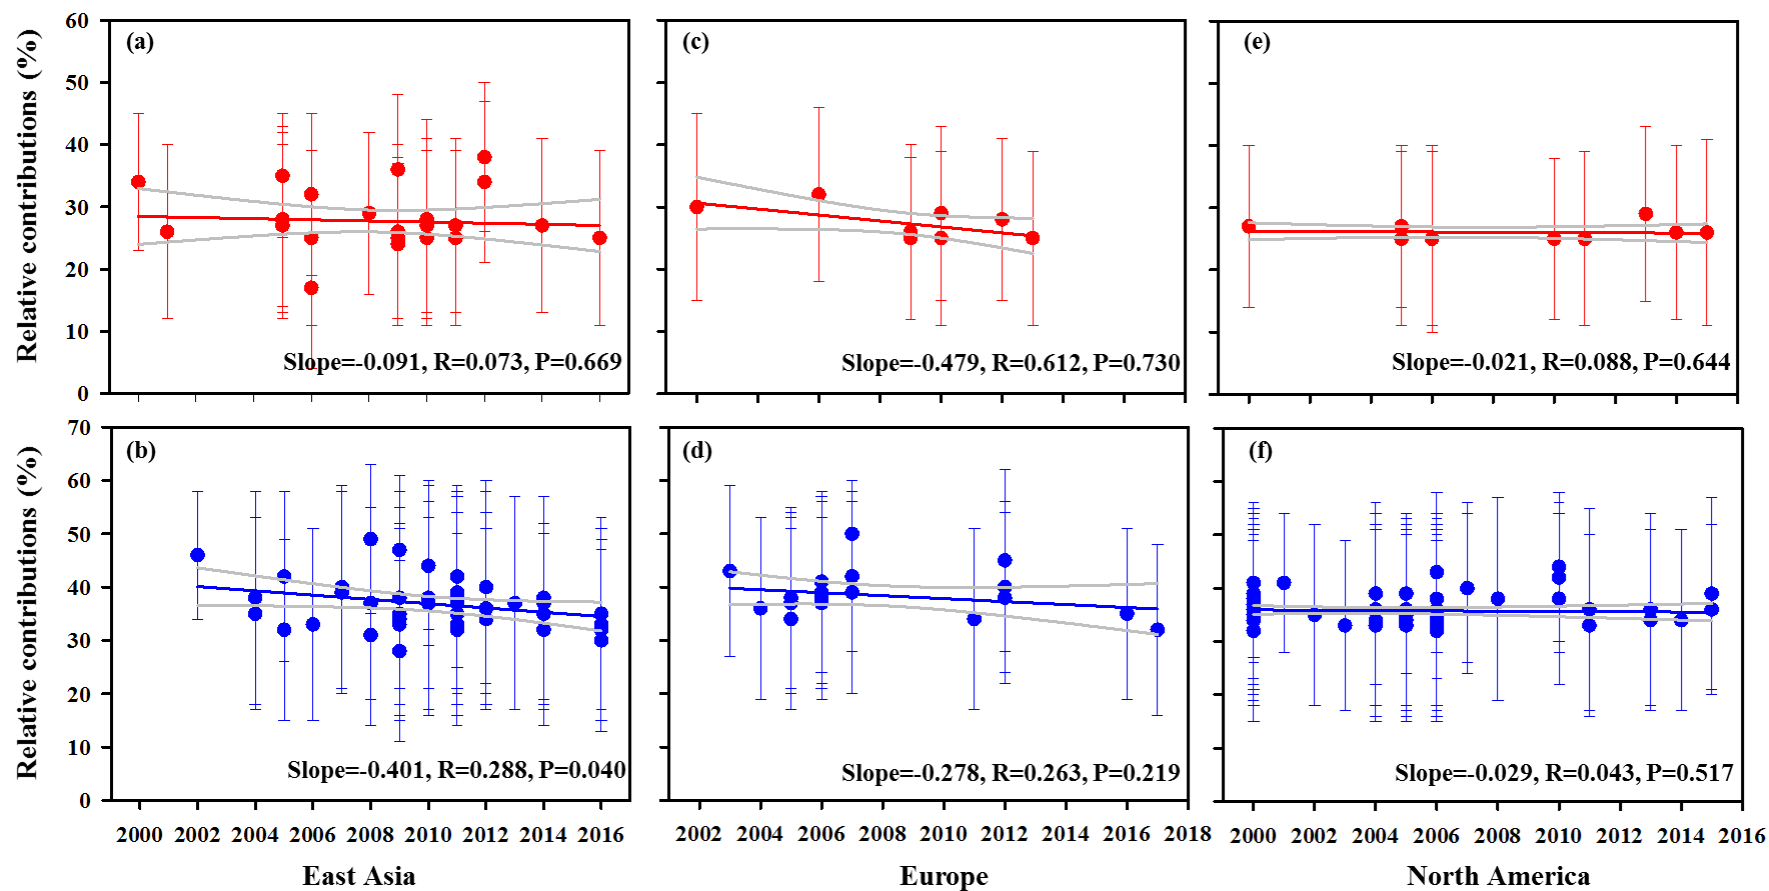

74  
75  
76  
77  
78  
79

**Supplementary Fig. 7 | Variations of relative contributions of NO<sub>x</sub> from biomass burning during 2000–2017 at urban (a, c, and e) and non-urban (b, d, and f) sites of East Asia, Europe, and North America, respectively.** Mean  $\pm$ SD values of relative contributions at each site in each year are shown ( $n=28, 9, 13$  for panels a, c, e and  $n=47, 21, 88$  for panels b, d, f, respectively). Calculations were detailed in Methods. The gray lines were the 95% confidence intervals.



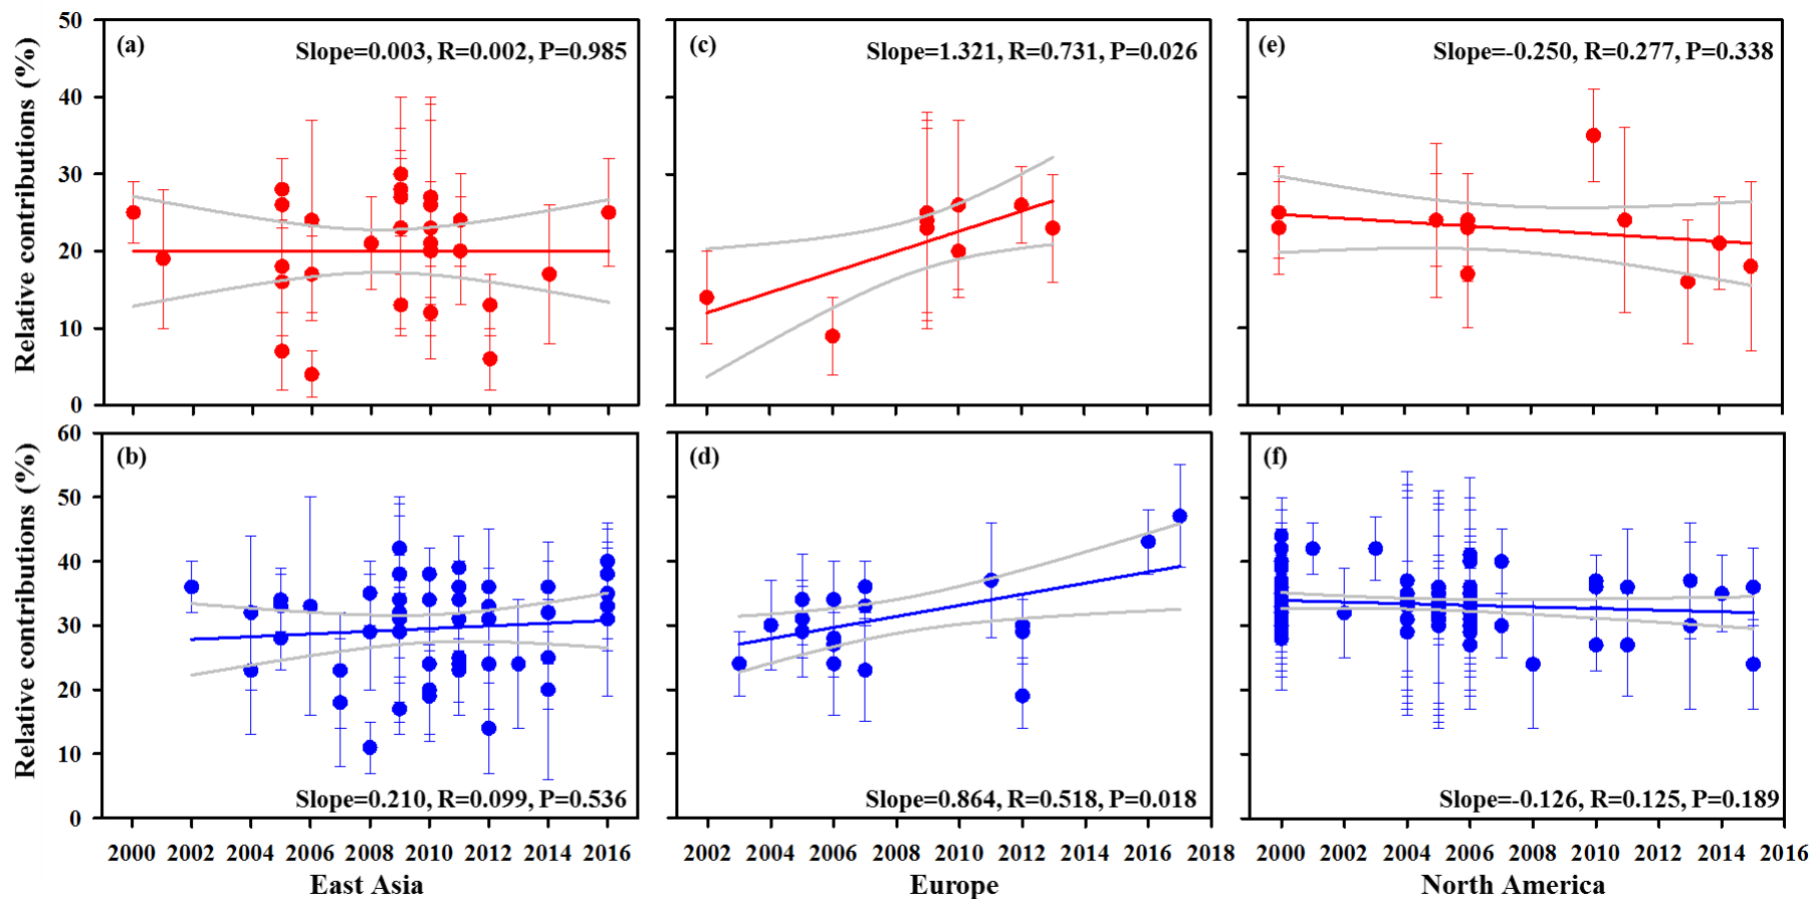

80

81 **Supplementary Fig. 8 | Variations of relative contributions of NO<sub>x</sub> from microbial N cycle during 2000–2017 at urban (a, c, and e) and**  
 82 **non-urban (b, d, and f) sites of East Asia, Europe, and North America, respectively. Mean ±SD values of relative contributions at each site**  
 83 **in each year are shown ( $n=28, 9, 13$  for panels a, c, e and  $n=47, 21, 88$  for panels b, d, f, respectively). Calculations were detailed in Methods.**  
 84 **The gray lines were the 95% confidence intervals.**

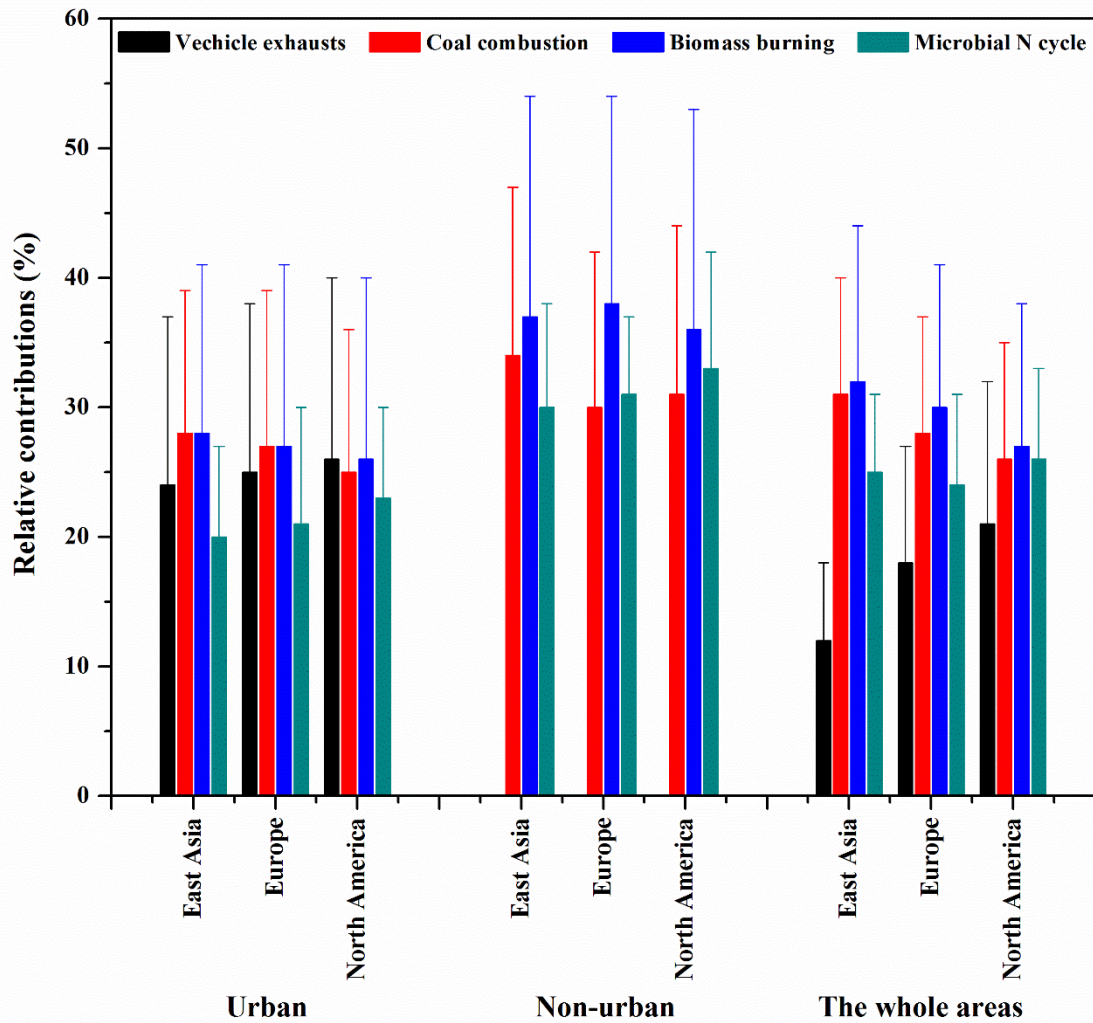

85

86 **Supplementary Fig. 9 | Annual mean relative contributions of NO<sub>x</sub> from vehicle**  
 87 **exhausts, coal combustion, biomass burning, and microbial N cycle to**  
 88 **precipitation NO<sub>3</sub><sup>-</sup> at urban sites, non-urban sites, and the whole areas of East**  
 89 **Asia, Europe, and North America, respectively during 2000-2017. Mean ±SD**  
 90 **values are shown (replicates are the same as those in Supplementary Figs. 5-8).**  
 91 **Calculations were detailed in Methods.**

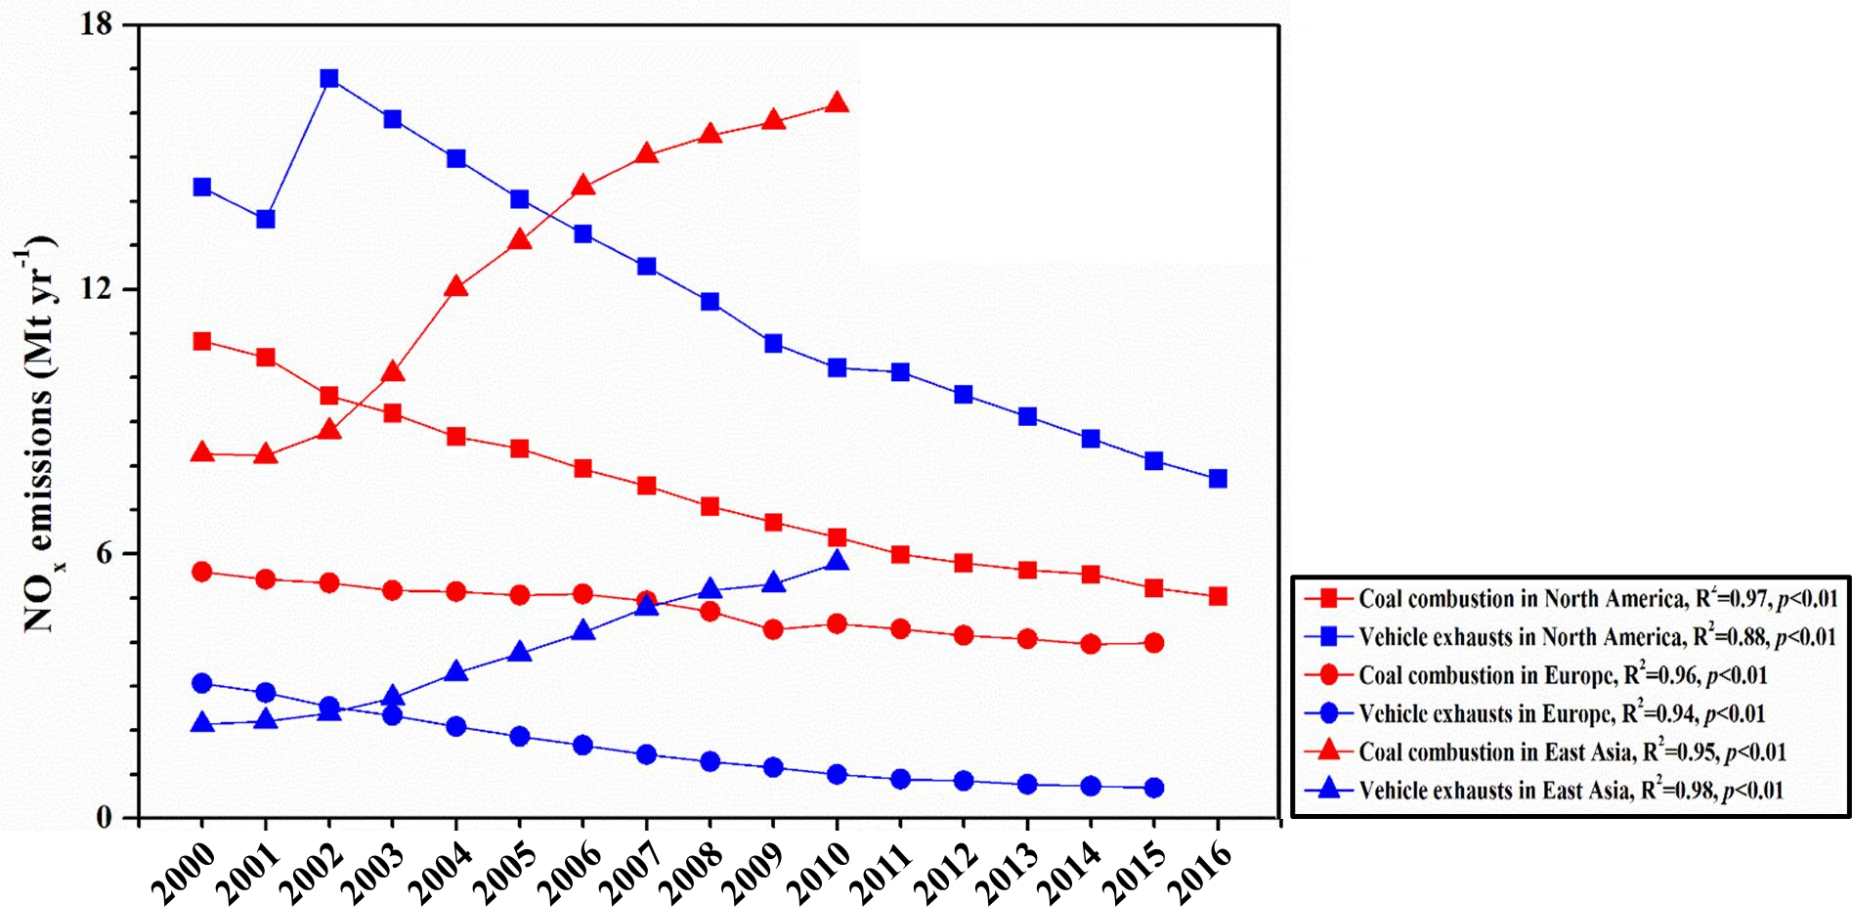

92

93 **Supplementary Fig. 10 | Annual NO<sub>x</sub> emissions from coal combustion and vehicle exhausts during 2000-2010 in East Asia, 2000-2015 in**  
 94 **Europe, and 2000-2016 in North America.** Data is cited from ref. 11 for East Asia, ref. 12 for Europe and refs. 13 and 14 for North America.

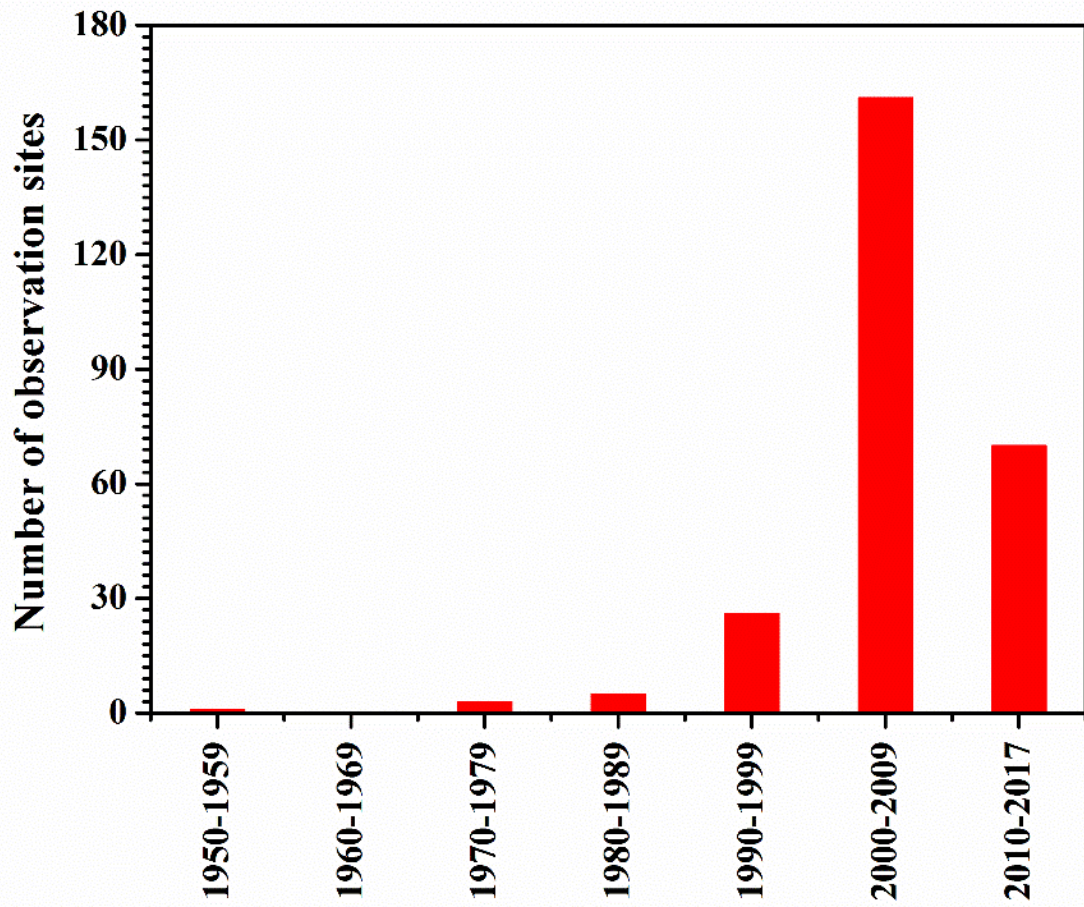

95  
96  
97

Supplementary Fig. 11 | Temporal distributions of  $\delta^{15}\text{N}_{\text{w-NO}_3}$ - observations from 1950 to 2017.



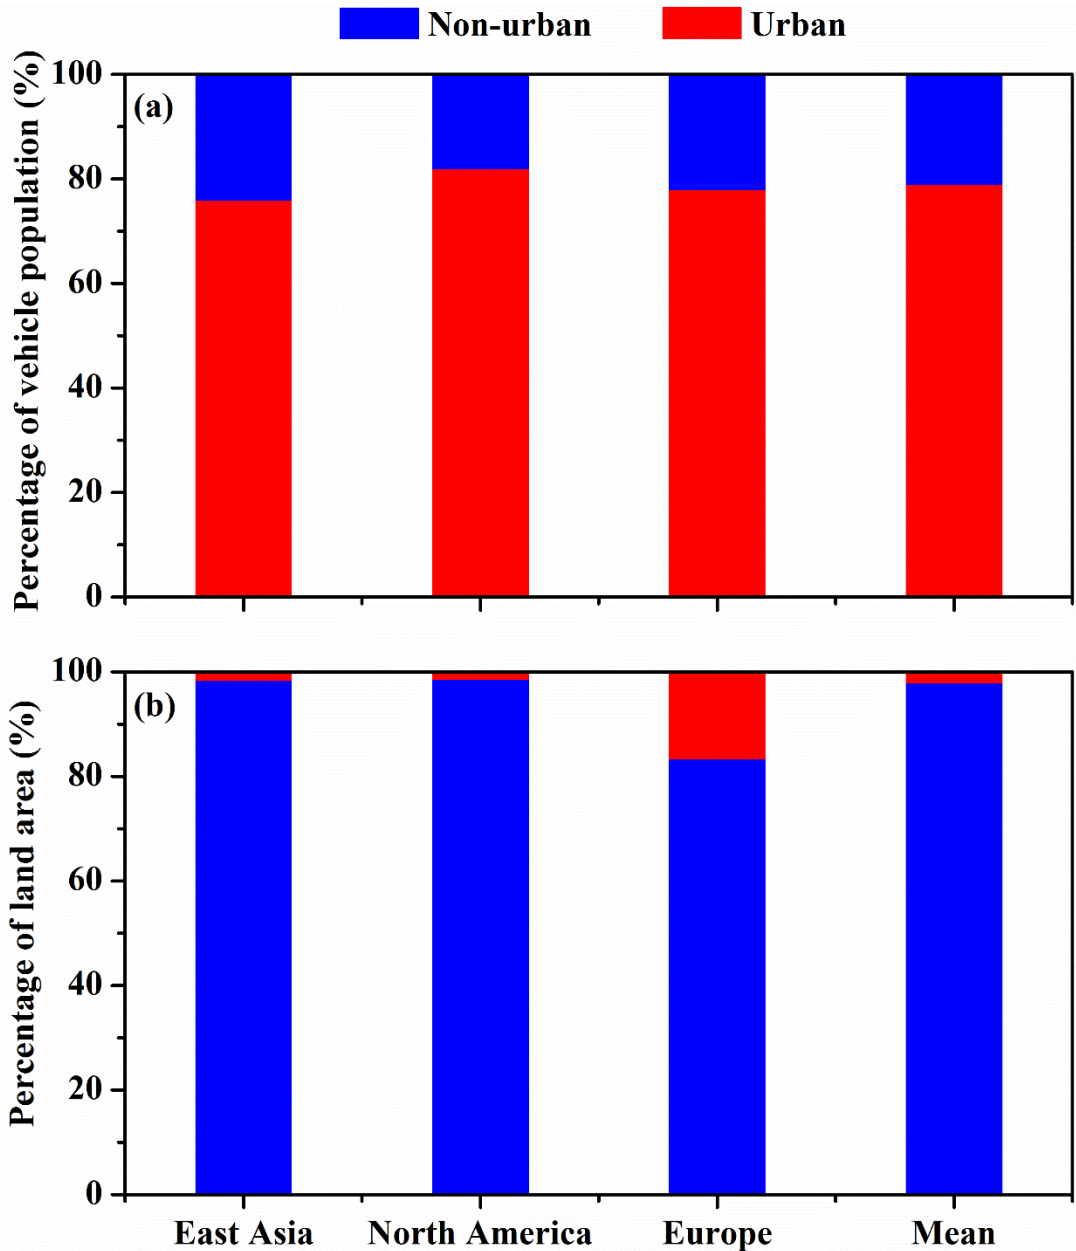

98

99 **Supplementary Fig. 12 | Percentages of vehicle populations of urban and non-**  
 100 **urban areas in the total (a), percentages of urban and non-urban areas in the**  
 101 **total land areas in different regions (b).** Calculating methods and data sources were  
 102 detailed in Supplementary Tables 2 & 3.

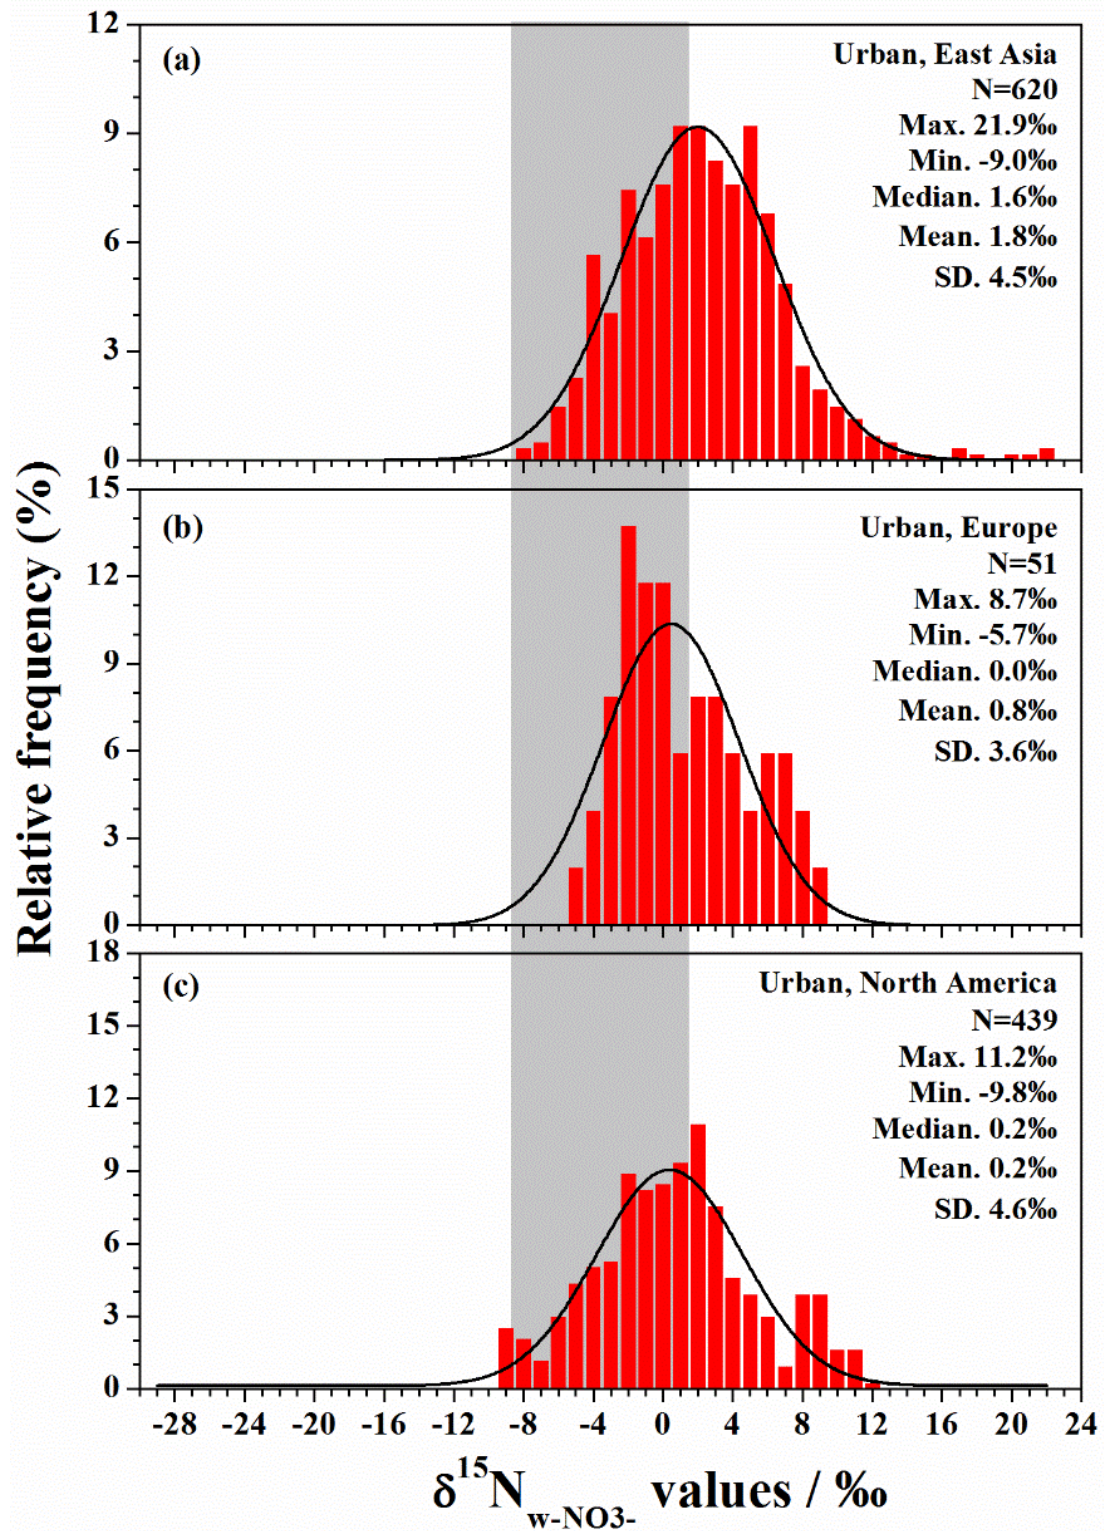



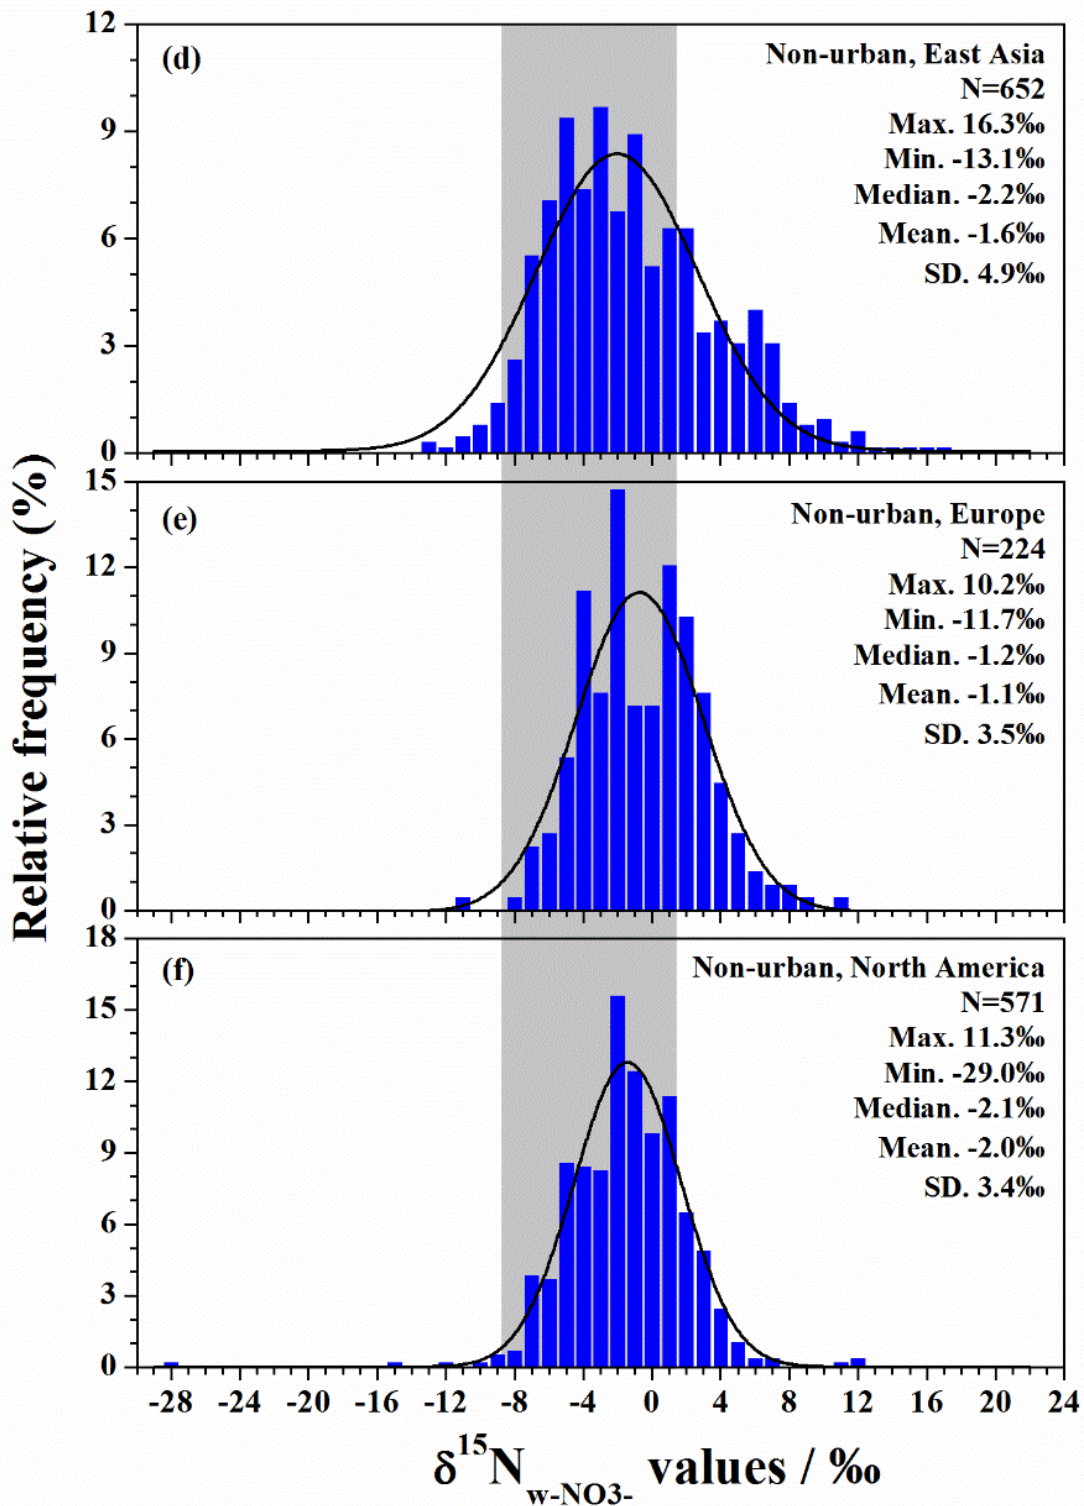

104

105 **Supplementary Fig. 13 | Relative frequency histograms of  $\delta^{15}\text{N}_{\text{w-NO}_3\text{-}}$  values at**  
 106 **urban (a, b, and c) and non-urban (d, e, and d) sites of East Asia, Europe, and**  
 107 **North America, respectively.** Measurements in independent observation years during  
 108 2000–2017 are shown. Trips shaded in the gray show the range of  $\delta^{15}\text{N}$  of  $\text{NO}_x$  from  
 109 vehicle exhausts (detailed in Supplementary Fig. 3).

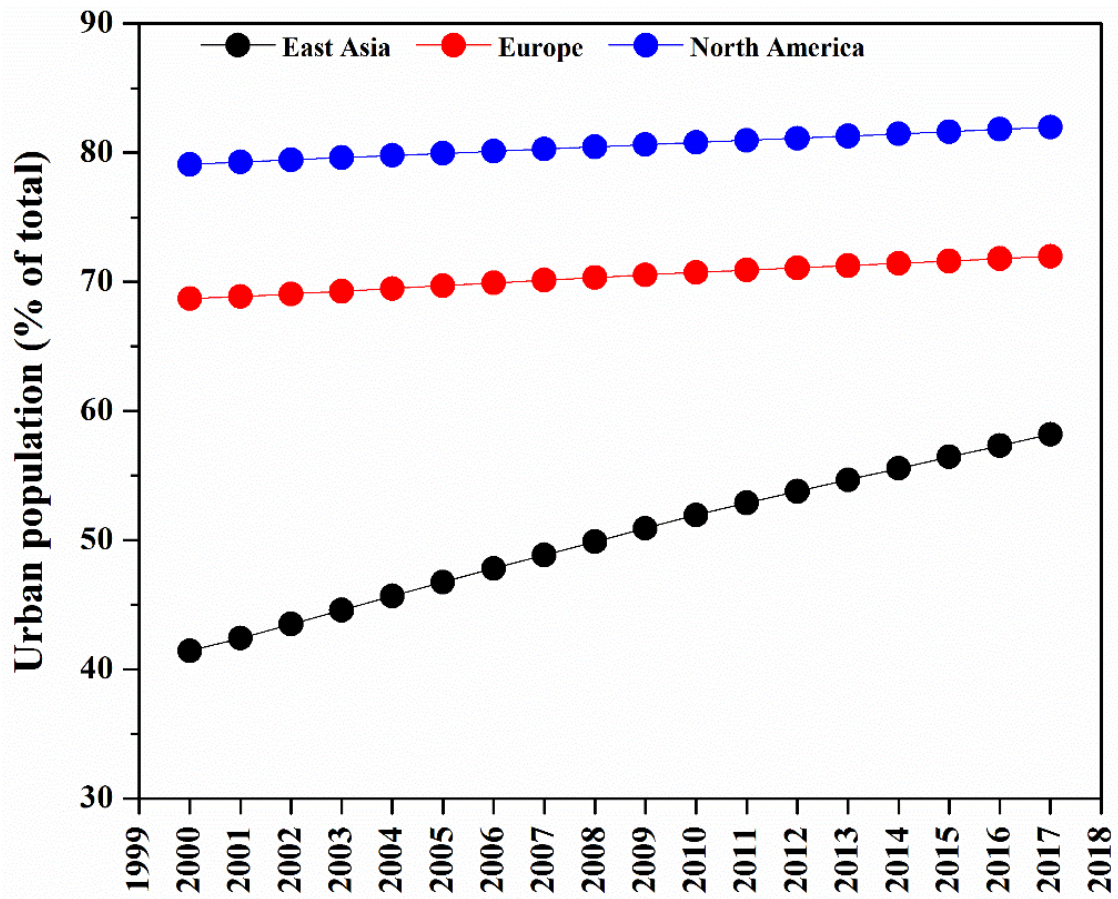

110

111 **Supplementary Fig. 14 | Percentages of urban population (expressed as % of**  
 112 **total) in East Asia, Europe, and North America between 2000–2017. Data were**  
 113 **downloaded from ref. 15.**



114 **Supplementary Table 1 | The data sources and values of parameters used for calculating ambient  $^{15}\Delta_{\text{I-NO}_x \rightarrow \text{w-NO}_3^-}$  values.** Scenario 1, mean  
 115 values of regional  $\delta^{15}\text{N}_{\text{NO}_x}$  and  $f_{\text{NO}_2}$  values, simultaneously observed values of ambient  $\text{C}_{\text{NO}_2}$ ,  $\text{C}_{\text{HNO}_3}$ ,  $\text{C}_{\text{p-NO}_3^-}$ ,  $\delta^{15}\text{N}_{\text{HNO}_3}$ ,  $\delta^{15}\text{N}_{\text{p-NO}_3^-}$ , and  $\delta^{15}\text{N}_{\text{w-NO}_3^-}$   
 116 were used. Scenario 2, non-synchronously observed values of ambient  $f_{\text{NO}_2}$ ,  $\text{C}_{\text{NO}_2}$ ,  $\text{C}_{\text{HNO}_3}$ ,  $\text{C}_{\text{p-NO}_3^-}$ ,  $\delta^{15}\text{N}_{\text{NO}_x}$ ,  $\delta^{15}\text{N}_{\text{HNO}_3}$ ,  $\delta^{15}\text{N}_{\text{p-NO}_3^-}$ , and  $\delta^{15}\text{N}_{\text{w-NO}_3^-}$   
 117 were used. (a) data were cited from Supplementary Texts 2 & 3; (b) data were cited from Supplementary Text 4; (c) data were cited from  
 118 Supplementary Text 5; (d) data were cited from Supplementary Texts 6, 7 & 8; (e) data were cited from Supplementary Text 1.

| Observations | Site, Country/Region | $\text{NO}_2$ ( $\mu\text{g N m}^{-3}$ ) <sup>(a)</sup> |     |          | $f_{\text{NO}_2}$ (%) <sup>(b)</sup> |      |          | $\text{HNO}_3$ ( $\mu\text{g N m}^{-3}$ ) <sup>(a)</sup> |     |          | $\text{p-NO}_3^-$ ( $\mu\text{g N m}^{-3}$ ) <sup>(a)</sup> |     |          |
|--------------|----------------------|---------------------------------------------------------|-----|----------|--------------------------------------|------|----------|----------------------------------------------------------|-----|----------|-------------------------------------------------------------|-----|----------|
|              |                      | Mean                                                    | SD  | <i>n</i> | Mean                                 | SD   | <i>n</i> | Mean                                                     | SD  | <i>n</i> | Mean                                                        | SD  | <i>n</i> |
| Scenario 1   | Jülich, Germany      | 1.0                                                     | 0.4 | 19       | 64.0                                 | 10.0 | 202      | 0.4                                                      | 0.1 | 12       | 1.2                                                         | 0.2 | 12       |
|              | Pennsylvania, USA    | 0.4                                                     | 0.2 | 6        | 64.0                                 | 10.0 | 202      | 0.2                                                      | 0.0 | 11       | 0.1                                                         | 0.1 | 11       |
|              | Rishiri, Japan       | 0.3                                                     | 0.1 | 12       | 64.0                                 | 10.0 | 202      | 0.1                                                      | 0.0 | 12       | 0.2                                                         | 0.1 | 12       |
|              | Sapporo, Japan       | 2.6                                                     | 0.8 | 11       | 64.0                                 | 10.0 | 202      | 0.1                                                      | 0.1 | 12       | 0.3                                                         | 0.1 | 12       |
|              | Alberta, Canada      | 0.9                                                     | 0.1 | 7        | 64.0                                 | 10.0 | 202      | 0.5                                                      | 0.2 | 15       | 0.3                                                         | 0.3 | 15       |
| Scenario 2   | East Asia            | 8.9                                                     | 1.1 | 194      | 64.0                                 | 10.0 | 202      | 0.2                                                      | 0.0 | 532      | 0.3                                                         | 0.1 | 546      |
|              | Europe               | 1.9                                                     | 0.1 | 200      | 64.0                                 | 10.0 | 202      | 0.2                                                      | 0.1 | 200      | 0.5                                                         | 0.3 | 200      |
|              | North America        | 7.3                                                     | 1.0 | 162      | 64.0                                 | 10.0 | 202      | 0.6                                                      | 0.1 | 420      | 0.2                                                         | 0.1 | 421      |

119 (continued)

| Observations | Site, Country/ Region | $\delta^{15}\text{N}_{\text{NO}_x}$ (‰) <sup>(c)</sup> |     |          | $\delta^{15}\text{N}_{\text{HNO}_3}$ (‰) <sup>(d)</sup> |     |          | $\delta^{15}\text{N}_{\text{p-NO}_3^-}$ (‰) <sup>(d)</sup> |     |          | $\delta^{15}\text{N}_{\text{w-NO}_3^-}$ (‰) <sup>(e)</sup> |     |          |
|--------------|-----------------------|--------------------------------------------------------|-----|----------|---------------------------------------------------------|-----|----------|------------------------------------------------------------|-----|----------|------------------------------------------------------------|-----|----------|
|              |                       | Mean                                                   | SD  | <i>n</i> | Mean                                                    | SD  | <i>n</i> | Mean                                                       | SD  | <i>n</i> | Mean                                                       | SD  | <i>n</i> |
| Scenario 1   | Jülich, Germany       | -7.7                                                   | 2.9 | 51       | -2.5                                                    | 0.6 | 12       | 7.3                                                        | 2.6 | 12       | -2.4                                                       | 2.1 | 12       |
|              | Pennsylvania, USA     | -7.7                                                   | 2.9 | 51       | 4.3                                                     | 2.8 | 11       | 7.0                                                        | 3.6 | 11       | 0.0                                                        | 1.7 | 11       |
|              | Rishiri, Japan        | -7.7                                                   | 2.9 | 51       | -0.7                                                    | 3.3 | 13       | 1.8                                                        | 1.7 | 12       | -3.8                                                       | 2.7 | 13       |
|              | Sapporo, Japan        | -7.7                                                   | 2.9 | 51       | 2.7                                                     | 1.4 | 13       | 6.2                                                        | 3.1 | 13       | -2.0                                                       | 1.7 | 13       |
|              | Alberta, Canada       | -7.7                                                   | 2.9 | 51       | -0.9                                                    | 3.3 | 5        | 5.3                                                        | 2.7 | 5        | -2.1                                                       | 1.6 | 5        |
| Scenario 2   | East Asia             | -7.7                                                   | 2.9 | 51       | -1.0                                                    | 4.9 | 49       | 2.3                                                        | 6.4 | 559      | -0.4                                                       | 4.9 | 1246     |
|              | Europe                | -7.7                                                   | 2.9 | 51       | -2.5                                                    | 0.9 | 13       | 3.9                                                        | 4.6 | 248      | -1.7                                                       | 4.1 | 275      |
|              | North America         | -7.7                                                   | 2.9 | 51       | 0.4                                                     | 3.9 | 287      | 5.1                                                        | 5.4 | 272      | -1.1                                                       | 4.0 | 994      |

120 **Supplementary Table 2** | Vehicles per capita, total population, urban and non-urban population (expressed as % in total), urban and non-urban  
 121 vehicles, % of urban and non-urban vehicles in total, total land area, % of urban land area in total, and urban areas of different countries.

| Regions       | Countries | Vehicles per capita<br>(a) | Total population<br>( $\times 10^8$ ) <sup>(b)</sup> | % of urban population<br>(c) | % of non-urban population<br>(d) | Urban vehicles<br>( $\times 10^5$ ) | Non-urban vehicles<br>( $\times 10^5$ ) | % of urban vehicles in total | % of non-urban vehicles in total | Total land areas<br>( $10^4$ km <sup>2</sup> )<br>(e) | % of urban land area in total<br>(f) | Urban land areas<br>( $10^4$ km <sup>2</sup> ) |
|---------------|-----------|----------------------------|------------------------------------------------------|------------------------------|----------------------------------|-------------------------------------|-----------------------------------------|------------------------------|----------------------------------|-------------------------------------------------------|--------------------------------------|------------------------------------------------|
| East Asia     | China     | 0.06                       | 13.71                                                | 56.0                         | 44.0                             | 460.7                               | 361.9                                   | 56.0                         | 44.0                             | 956.3                                                 | 1.0                                  | 9.5                                            |
|               | Japan     | 0.78                       | 1.27                                                 | 91.0                         | 9.0                              | 901.5                               | 89.2                                    | 91.0                         | 9.0                              | 37.8                                                  | 14.3                                 | 5.4                                            |
|               | Korea     | 0.55                       | 0.51                                                 | 82.0                         | 18.0                             | 230.0                               | 50.5                                    | 82.0                         | 18.0                             | 10.0                                                  | 16.6                                 | 1.7                                            |
| North America | USA       | 0.82                       | 3.21                                                 | 82.0                         | 18.0                             | 2158.4                              | 473.8                                   | 82.0                         | 18.0                             | 983.2                                                 | 2.6                                  | 25.8                                           |
|               | Canada    | 0.80                       | 0.36                                                 | 81.0                         | 19.0                             | 231.3                               | 54.3                                    | 81.0                         | 19.0                             | 998.5                                                 | 0.3                                  | 2.7                                            |
| Europe        | England   | 0.71                       | 0.65                                                 | 83.0                         | 17.0                             | 383.6                               | 78.6                                    | 83.0                         | 17.0                             | 24.4                                                  | 5.9                                  | 1.5                                            |
|               | France    | 0.74                       | 0.66                                                 | 80.0                         | 20.0                             | 390.7                               | 97.7                                    | 80.0                         | 20.0                             | 54.9                                                  | 12.4                                 | 6.8                                            |
|               | Germany   | 0.77                       | 0.82                                                 | 77.0                         | 23.0                             | 484.4                               | 144.7                                   | 77.0                         | 23.0                             | 35.7                                                  | 27.5                                 | 9.8                                            |
|               | Italy     | 0.77                       | 0.61                                                 | 70.0                         | 30.0                             | 327.2                               | 140.2                                   | 70.0                         | 30.0                             | 30.1                                                  | 20.1                                 | 6.1                                            |

122 (a) data were cited from ref. 16.

123 (b-e) data were downloaded from ref. 17.

124 (f) data were downloaded from refs. 18–20.

125 **Supplementary Table 3** | Urban and non-urban vehicles, % of urban and non-urban vehicles in total, total land areas, urban land areas, and %  
 126 of urban and non-urban land areas of different three regions.

| Regions           | Urban vehicles<br>( $\times 10^5$ ) | Non-urban vehicles<br>( $\times 10^5$ ) | % of urban vehicles | % of non-urban vehicles | Total land areas<br>( $10^4 \text{ km}^2$ ) | Urban land areas<br>( $10^4 \text{ km}^2$ ) | % of urban land areas | % of non-urban land areas |
|-------------------|-------------------------------------|-----------------------------------------|---------------------|-------------------------|---------------------------------------------|---------------------------------------------|-----------------------|---------------------------|
| East Asia         | 1592.1                              | 501.6                                   | 76.0                | 24.0                    | 1004.1                                      | 16.5                                        | 1.7                   | 98.4                      |
| North America     | 2389.7                              | 528.1                                   | 82.0                | 18.0                    | 1981.6                                      | 28.5                                        | 1.4                   | 98.6                      |
| Europe            | 1585.9                              | 461.2                                   | 78.0                | 22.0                    | 145.1                                       | 24.1                                        | 16.6                  | 83.4                      |
| All three regions | 5567.8                              | 1490.8                                  | 79.0                | 21.0                    | 3130.9                                      | 69.1                                        | 2.2                   | 97.8                      |

127

128 **Supplementary References:**

- 129 (1) Felix, J. D., Elliott, E. M. & Shaw, S. L. The isotopic composition of coal-fired  
130 power plant NO<sub>x</sub>: The influence of emission controls and implications for global  
131 emission inventories. *Environ. Sci. Technol.* **46**, 3528–3535 (2012).
- 132 (2) Heaton, T. H. E. <sup>15</sup>N/<sup>14</sup>N ratios of NO<sub>x</sub> from vehicle engines and coal-fired power  
133 station. *Tellus B.* **42**, 304–307 (1990).
- 134 (3) Li, D. J. & Wang, X. M. Nitrogen isotopic signature of soil-released nitric oxide  
135 (NO) after fertilizer application. *Atmos. Environ.* **42**, 4747–4754 (2008).
- 136 (4) Felix, J. D., Elliott, E. M., Gish, T. J., McConnell, L. L. & Shaw, S. L.  
137 Characterizing the isotopic composition of atmospheric ammonia emission  
138 sources using passive samplers and a combined oxidation-bacterial denitrifier  
139 isotope ratio mass spectrometer method. *Rapid. Commun. Mass. Spectrom.* **27**,  
140 2239–2246 (2013).
- 141 (5) Felix, J. D. & Elliott, E. M. The isotopic composition of passively collected  
142 nitrogen dioxide emissions: Vehicle, soil and livestock source signatures. *Atmos.*  
143 *Environ.* **92**, 359–366 (2014).
- 144 (6) Walters, W. W., Goodwin, S. R. & Michalski, G. The nitrogen stable isotope  
145 composition (<sup>15</sup>N) of vehicle emitted NO<sub>x</sub>. *Environ. Sci. Technol.* **49**, 2278–2285  
146 (2015).
- 147 (7) Fibiger, D. L. & Hastings, M. G. First measurements of the nitrogen isotopic  
148 composition of NO<sub>x</sub> from biomass burning. *Environ. Sci. Technol.* **50**,  
149 11569–11574 (2016).
- 150 (8) Wang, X., Ti, C. P., Luo, Y. X. & Sun, X. L. Determination of <sup>15</sup>N natural  
151 abundance in nitrogen oxides from major anthropogenic emission sources. *Acta*  
152 *Pedologica Sinica.* **53**, 1552–1562 (2016). (in Chinese with English Abstract).
- 153 (9) Chai, J., et al. Isotopic characterization of nitrogen oxides (NO<sub>x</sub>), nitrous acid  
154 (HONO), and nitrate (NO<sub>3</sub><sup>-</sup>(p)) from laboratory biomass burning during FIREX,  
155 *Atmos. Meas. Tech.* **12**, 6303–6317 (2019).
- 156 (10) [http://www.bp.com/en/global/corporate/energy-economics/statistical-review-of-](http://www.bp.com/en/global/corporate/energy-economics/statistical-review-of-world-energy/downloads.html)  
157 [world-energy/downloads.html](http://www.bp.com/en/global/corporate/energy-economics/statistical-review-of-world-energy/downloads.html)
- 158 (11) Wang, S. X., Zhao, B., Cai, S. Y., Klimont, Z., Nielsen, C. P. & Morikawa, T.  
159 Emission trends and mitigation options for air pollutants in East Asia. *Atmos.*  
160 *Chem. Phys.* **14**, 6571–6603 (2014).
- 161 (12) National emission ceilings directive emissions data viewer 1990-2017. Data were  
162 downloaded from [https://www.eea.europa.eu/data-and-maps/dashboards/necd-](https://www.eea.europa.eu/data-and-maps/dashboards/necd-directive-data-viewer-2)  
163 [directive-data-viewer-2](https://www.eea.europa.eu/data-and-maps/dashboards/necd-directive-data-viewer-2).
- 164 (13) Air pollutant emissions trends data. Data were downloaded from  
165 [https://www.epa.gov/air-emissions-inventories/air-pollutant-emissions-trends-](https://www.epa.gov/air-emissions-inventories/air-pollutant-emissions-trends-data)  
166 [data](https://www.epa.gov/air-emissions-inventories/air-pollutant-emissions-trends-data).
- 167 (14) Air pollutants emissions inventory online search. Data were downloaded from  
168 <https://pollution-waste.canada.ca/air-emission-inventory>.

- 169 (15) <https://data.worldbank.org.cn/>.
- 170 (16) Dargay, J. & Gately, D. Income's effect on car and vehicle ownership, worldwide:  
171 1960–2015. *Transport. Res. A: Pol.* **33**, 101–138 (1999).
- 172 (17) <https://data.worldbank.org.cn/>.
- 173 (18) <http://www.demographia.com/db-intlualand.htm>.
- 174 (19) <https://new.qq.com/rain/a/20150724017824>.
- 175 (20) <http://finance.people.com.cn/n1/2017/1228/c1004-29734355.html>.
- 176

177 **Supplementary Text 1 | Publications of  $\delta^{15}\text{N}_{\text{w-NO}_3}$ - observations.**

- 178 (21) Altieri, K. E., Hastings, M. G., Gobel, A. R., Peters, A. J. & Sigman, D. M.  
179 Isotopic composition of rainwater nitrate at bermuda: the influence of air mass  
180 source and chemistry in the marine boundary layer. *J. Geophys. Res. Atmos.*  
181 **118**, doi:10.1002/jgrd.50829 (2013).
- 182 (22) Amiri, H., Zare, M. & Widory, D. Assessing sources of nitrate contamination in  
183 the shiraz urban aquifer (Iran) using the  $\delta^{15}\text{N}$  and  $\delta^{18}\text{O}$  dual-isotope approach.  
184 *Isot. Environ. Health. S.* **51**,392–410 (2015).
- 185 (23) Anisfeld, S. C., Barnes, R. T., Altabet, M. A. & Wu, T. X. Isotopic apportionment  
186 of atmospheric and sewage nitrogen sources in two Connecticut rivers.  
187 *Environ. Sci. Technol.* **41**, 6363–6369 (2007).
- 188 (24) Ansari, A. H., Hodson, A. J., Heaton, T. H. E., Kaiser, J. & Marca-Bell, A. Stable  
189 isotopic evidence for nitrification and denitrification in a high arctic glacial  
190 ecosystem. *Biogeochemistry* **113**, 341–357 (2012).
- 191 (25) Baranes, R. T. & Raymond, P. A. Land-use controls on sources and processing of  
192 nitrate in small watersheds: insights from dual isotopic analysis. *Ecol. Appl.*  
193 **20**, 1961–1978 (2010).
- 194 (26) Barnes, R. T., Raymond, P. A. & Casciotti, K. L. Dual isotope analyses indicate  
195 efficient processing of atmospheric nitrate by forested watersheds in the  
196 northeastern U.S. *Biogeochemistry* **90**, 15–27 (2008).
- 197 (27) Barrett, M., Hiscock, K., Pedley, S., Lerner, D., Tellam, J. & French, M. Marker  
198 species for identifying urban groundwater recharge sources: a review and case  
199 study in Nottingham, UK. *Water Res.* **33**, 3083–3097 (1999).
- 200 (28) Bernal, S., Hedin, L. O., Likens, G. E., Gerber, S. & Buso, D. C. Complex  
201 response of the forest nitrogen cycle to climate change. *P. Nat. Acad. Sci.* **109**,  
202 3406–3411 (2012).
- 203 (29) Beyn, F., Matthias, V. & Dähnke, K. Changes in atmospheric nitrate deposition in  
204 Germany-an isotopic perspective. *Environ. Pollut.* **194**, 1–10 (2014).
- 205 (30) Beyn, F., Matthias, V., Aulinger, A. & Dähnke, K. Do N-isotopes in atmospheric  
206 nitrate deposition reflect air pollution levels? *Atmos. Environ.* **107**, 281–288  
207 (2015).
- 208 (31) Billy, C., Billen, G., Sebilo, M., Birgand, F. & Tournebize, J. Nitrogen isotopic  
209 composition of leached nitrate and soil organic matter as an indicator of  
210 denitrification in a sloping drained agricultural plot and adjacent uncultivated  
211 riparian buffer strips. *Soil Biol. Biochem.* **42**, 108–117 (2010).
- 212 (32) Buda, A. R. & Dewalle, D. R. Dynamics of stream nitrate sources and flow  
213 pathways during stormflows on urban, forest and agricultural watersheds in  
214 central Pennsylvania, USA. *Hydrol. Process.* **23**, 3292–3305 (2010).
- 215 (33) Burns, D. A. & Kendall, C. Analysis of  $\delta^{15}\text{N}$  and  $\delta^{18}\text{O}$  to differentiate  $\text{NO}_3^-$   
216 sources in runoff at two watersheds in the Catskill Mountains of New York.  
217 *Water Resour. Res.* doi:10.1029/2001WR000292 (2002).

- 218 (34) Buzek, F., Černý, J. & Pačes, T. The behavior of nitrogen isotopes in acidified  
219 forest soils in the Czech Republic. *Water Air Soil Poll.* **105**, 155–164 (1998).
- 220 (35) Campbell, D. H., Kendall, C., Chang, C. C. Y., Silva, S. R. & Tonnessen, K. A.  
221 Pathways for nitrate release from an alpine watershed: determination using  
222  $\delta^{15}\text{N}$  and  $\delta^{18}\text{O}$ . *Water Resour. Res.* doi:10.1029/2001WR000294 (2002).
- 223 (36) Campbell, J. L., Mitchell, M. J. & Mayer, B. Isotopic assessment of  $\text{NO}_3^-$  and  
224  $\text{SO}_4^{2-}$  mobility during winter in two adjacent watersheds in the Adirondack  
225 Mountains, New York. *J. Geophys. Res. Biogeo.* **111**, G04007,  
226 doi:10.1029/2006JG000208 (2006).
- 227 (37) Carrillo, J. H., Hastings, M. G., Sigman, D. M. & Heubert, B. J. Atmospheric  
228 deposition of inorganic and organic nitrogen and base cations in Hawaii.  
229 *Global Biogeochem. Cy.* **16**, 1076, doi:10.1029/2002GB001892 (2002).
- 230 (38) Charles, T. & Garten, J. R. Stable nitrogen isotope ratios in wet and dry nitrate  
231 deposition collected with an artificial tree. *Tellus B.* **48**, 60–64 (1996).
- 232 (39) Chen, Z. X., Yu, L., Liu, W. G., Lam, M. H. W., Liu, G. L. & Yin, X. B. Nitrogen  
233 and oxygen isotopic compositions of water-soluble nitrate in Taihu Lake water  
234 system, China: implication for nitrate sources and biogeochemical process.  
235 *Environ. Earth. Sci.* **71**, 217–223 (2014).
- 236 (40) Clow, D. W., Roop, H. A., Nanus, L., Fenn, M. E. & Sexstone, G. A. Spatial  
237 patterns of atmospheric deposition of nitrogen and sulfur using ion-exchange  
238 resin collectors in Rocky Mountain national park, USA. *Atmos. Environ.* **101**,  
239 149–157 (2015).
- 240 (41) Cui, J., Zhou, F. W., Gao, M., Zhang, L. Y., Zhang, L. M., Du, K., Leng, Q. M.,  
241 Zhang, Y. Z., He, D. Y., Yang, F. M. & Chan, A. A comparison of various  
242 approaches used in source apportionments for precipitation nitrogen in a  
243 mountain region of Southwest China. *Environ. Pollut.* **241**, 810–820 (2018).
- 244 (42) Curtis, C. J. & Heaton, T. H. E. What have stable isotope studies revealed about  
245 the nature and mechanisms of N saturation and nitrate leaching from semi-  
246 natural catchments? *Ecosystems* **14**, 1021–1037 (2011).
- 247 (43) Curtis, C. J., Heaton, T. H. E., Simpson, G. L., Evans, C. D., Shilland, J. &  
248 Turner, S. Dominance of biologically produced nitrate in upland waters of  
249 Great Britain indicated by stable isotopes. *Biogeochemistry* **111**, 535–554  
250 (2012).
- 251 (44) Curtis, C. J., Kaiser, J., Marca, A., Anderson, N. J., Simpson, G. & Jones, V.  
252 Spatial variations in snowpack chemistry, isotopic composition of  $\text{NO}_3^-$  and  
253 nitrogen deposition from the ice sheet margin to the coast of western  
254 Greenland. *Biogeosciences Discuss*, **15**, 1–32 (2018).
- 255 (45) Deutsch, B., Mewes, M., Liskow, I. & Voss, M. Quantification of diffuse nitrate  
256 inputs into a small river system using stable isotopes of oxygen and nitrogen in  
257 nitrate. *Org. Geochem.* **37**, 1333–1342 (2006).

- 258 (46) Ding, J., Xi, B., Gao, R., He, L., Liu, H., Dai, X. & Yu, Y. Identifying diffused  
259 nitrate sources in a stream in an agricultural field using a dual isotopic  
260 approach. *Sci. Total Environ.* **484**, 10–18 (2014).
- 261 (47) Divers, M. T., Elliott, E. M. & Bain, D. J. Quantification of nitrate sources to an  
262 urban stream using dual nitrate isotopes. *Environ. Sci. Technol.* **48**,  
263 10580–10587 (2014).
- 264 (48) Durka, W., Schulze, E. D., Gebauer, G. & Voerkeliust, S. Effects of forest decline  
265 on uptake and leaching of deposited nitrate determined from  $^{15}\text{N}$  and  $^{18}\text{O}$   
266 measurements. *Nature* **372**, 765–767 (1994).
- 267 (49) Elliott, E. M., Kendall, C., Wankel, S. D., Burns, D. A., Boyer, E. W. & Harlin,  
268 K. Nitrogen isotopes as indicators of  $\text{NO}_x$  source contributions to atmospheric  
269 nitrate deposition across the Midwestern and Northeastern United States.  
270 *Environ. Sci. Technol.* **41**, 7661–7667 (2007).
- 271 (50) Emmett, B. A., Kjonaas, O. J., Gundersen, P., Koopmans, C., Tietema, A. &  
272 Sleep, D. Natural abundance of  $^{15}\text{N}$  in forests across a nitrogen deposition  
273 gradient. *Forest Ecol. Manag.* **101**, 9–18 (1998).
- 274 (51) Fang, Y. T., Koba, K., Makabe, A., Takahashi, C., Zhu, W. X., Hayashi, T.,  
275 Hokari, A. A., Urakawa, R., Bai, E., Houlton, B. Z., Xi, D., Zhang, S. S.,  
276 Matsushita, K., Tu, Y., Liu, D. W., Zhu, F. F., Wang, Z. Y., Zhou, G. Y., Chen,  
277 D. X., Makita, T., Toda, H., Liu, X. Y., Chen, Q. S., Zhang, D. Q., Li, Y. D. &  
278 Yoh, M. Microbial denitrification dominates nitrate losses from forest  
279 ecosystems. *P. Nat. Acad. Sci.* **112**, 1470–1474 (2015).
- 280 (52) Fang, Y. T., Koba, K., Wang, X. M., Wen, D. Z., Li, J., Takebayashi, Y., Liu, X.  
281 Y. & Yoh, M. Anthropogenic imprints on nitrogen and oxygen isotopic  
282 composition of precipitation nitrate in a nitrogen-polluted city in southern  
283 China. *Atmos. Chem. Phys.* **11**, 1313–1325 (2011).
- 284 (53) Felix, J. D., Elliott, E. M., Avery, G. B., Kieber, R. J., Mead, R. N., & Willey, J.  
285 D. Isotopic composition of nitrate in sequential Hurricane Irene precipitation  
286 samples: implications for changing  $\text{NO}_x$  sources. *Atmos. Environ.* **106**,  
287 191–195 (2015).
- 288 (54) Fogel, M. L. & Paerl, H. W. Isotopic tracers of nitrogen from atmospheric  
289 deposition to coastal waters. *Chem. Geol.* **107**, 233–236 (1993).
- 290 (55) Freyer, H. D. Seasonal trends of  $\text{NH}_4^+$  and  $\text{NO}_3^-$  nitrogen isotope composition in  
291 rain collected at Jülich, Germany. *Tellus B.* **30**, 83–92 (1978).
- 292 (56) Freyer, H. D. Seasonal variation of  $^{15}\text{N}/^{14}\text{N}$  ratios in atmospheric nitrate species.  
293 *Tellus B.* **43**, 30–44 (1991).
- 294 (57) Freyer, H. D., Kobel, K., Delmas, R. J., Kley, D. & Legrand, M. R. First results  
295 of  $^{15}\text{N}/^{14}\text{N}$  ratios in nitrate from alpine and polar ice cores. *Tellus B.* **48**,  
296 93–105 (1996).
- 297 (58) Fukuzaki, N. & Hayasaka, H. Seasonal variations of nitrogen isotopic ratios of  
298 ammonium and nitrate in precipitations collected in the Yahiko-Kakuda



- 299 Mountains area in Niigata Prefecture, Japan. *Water Air Soil Poll.* **203**, 391–397  
300 (2009).
- 301 (59) Gao, Y. Atmospheric nitrogen deposition to Barnegat Bay. *Atmos. Environ.* **36**,  
302 5783–5794 (2002).
- 303 (60) Garten, C. T. Nitrogen isotope composition of ammonium and nitrate in bulk  
304 precipitation and forest throughfall. *Intern. J. Environ. Anal. Chem.* **47**, 33–45  
305 (1992).
- 306 (61) Geng, L. Alexander, B. Cole-Dai, J. Steig, E. J. Savarino, J. Sofen, E. D. &  
307 Schauer, A. J. Nitrogen isotopes in ice core nitrate linked to anthropogenic  
308 atmospheric acidity change. *P. Nat. Acad. Sci.* **111**, 5808–5812 (2014).
- 309 (62) Gobel, A. R., Altieri, K. E., Peters, A. J., Hastings, M. G. & Sigman, D. M.  
310 Insights into anthropogenic nitrogen deposition to the North Atlantic  
311 investigated using the isotopic composition of aerosol and rainwater nitrate.  
312 *Geophys. Res. Lett.* **40**, 5977–5982 (2013).
- 313 (63) Goodale, C. L., Thomas, S. A., Fredriksen, G., Elliott, E. M., Flinn, K. M.,  
314 Butler, T. J. & Walter, M. T. Unusual seasonal patterns and inferred processes  
315 of nitrogen retention in forested headwaters of the Upper Susquehanna River.  
316 *Biogeochemistry* **93**, 197–218 (2009).
- 317 (64) Guerrieri, R., Vanguelova, E. I. Michalski, G. Heaton, T. H. E. & Mencuccini, M.  
318 Isotopic evidence for the occurrence of biological nitrification and nitrogen  
319 deposition processing in forest canopies. *Global Change Biol.* **21**, 4613–4626  
320 (2015).
- 321 (65) Haberhauer, G., Gerzabek, M. H. & Krenn, A. Nitrate dynamics in an alpine  
322 forest site (mühleggerköpfl) O and N stable isotope analysis in natural water  
323 samples. *Environ. Sci. Pollut. R.* **9**, 37–41 (2002).
- 324 (66) Hale, R. L., Turnbull, L., Earl, S., Grimm, N., Riha, K., Michalski, G., Lohse, K.  
325 A. & Childers, D. Sources and transport of nitrogen in arid urban watersheds.  
326 *Environ. Sci. Technol.* **48**, 6211–6219 (2014).
- 327 (67) Hales, H. C., Ross, D. S. & Lini, A. Isotopic signature of nitrate in two  
328 contrasting watersheds of Brush Brook, Vermont, USA. *Biogeochemistry* **84**,  
329 51–66 (2007).
- 330 (68) Hall, S. J., Ogata, E. M., Weintraub, S. R., Baker, M. A., Ehleringer, J. R. &  
331 Czimczik, C. I. Convergence in nitrogen deposition and cryptic isotopic  
332 variation across urban and agricultural valleys in Northern Utah. *J. Geophys.*  
333 *Res. Biogeo.* **121**, 2340–2355 (2016).
- 334 (69) Hastings, M. G., Sigman, D. M. & Lipschultz, F. Isotopic evidence for source  
335 changes of nitrate in rain at Bermuda. *J. Geophys. Res. Atmos.* 2003.  
336 doi:10.1029/2003JD003789 (2003).
- 337 (70) Hastings, M. G., Steig, E. J. & Sigman, D. M. Seasonal variations in N and O  
338 isotopes of nitrate in snow at Summit, Greenland: implications for the study of  
339 nitrate in snow and ice cores. *J. Geophys. Res. Atmos.*  
340 doi:10.1029/2004JD004991 (2004).

- 341 (71) Heaton, T. H. E. & Robertson, S. M. C. Potential canopy influences on the  
342 isotopic composition of nitrogen and sulphur in atmospheric deposition.  
343 *Oecologia* **109**, 600–607 (1997).
- 344 (72) Heaton, T. H. E.  $^{15}\text{N}/^{14}\text{N}$  ratios of nitrate and ammonium in rain at Pretoria, south  
345 Africa. *Atmo. Environ.* **21**, 843–852 (1987).
- 346 (73) Heaton, T. H. E., Wynn, P. & Tye, A. M. Low  $^{15}\text{N}/^{14}\text{N}$  ratios for nitrate in snow in  
347 the High Arctic (70°N). *Atmos. Environ.* **38**, 5611–5621 (2004).
- 348 (74) Hernandez, D. A. S. Determining sources of nitrate in the semi-arid Rio Grande  
349 using nitrogen and oxygen isotopes. Master Thesis, The University of  
350 Tennessee. (2017).
- 351 (75) Hoering, T. The isotopic composition of the ammonia and the nitrate ion in rain.  
352 *Geochim. Cosmochim. Ac.* **12**, 97–102 (1957).
- 353 (76) Homyak, P. M., Sickman, J. O., Miller, A. E., Melack, J. M., Meixner, T. &  
354 Schimel, J. P. Assessing nitrogen-saturation in a seasonally dry chaparral  
355 watershed: limitations of traditional indicators of N-saturation. *Ecosystems* **17**,  
356 1286–1305 (2014).
- 357 (77) Houlton, B. Z., Sigman, D. M. & Hedin, L. O. Isotopic evidence for large  
358 gaseous nitrogen losses from tropical rainforests. *P. Nat. Acad. Sci.* **103**,  
359 8745–8750 (2006).
- 360 (78) Jia, G. D. & Chen, F. J. Monthly variations in nitrogen isotopes of ammonium  
361 and nitrate in wet deposition at Guangzhou, south China. *Atmos. Environ.* **44**,  
362 2309–2315 (2010).
- 363 (79) Jiang, Y. J., Wu, Y. X. & Yuan, D. X. Human impacts on karst groundwater  
364 contamination deduced by coupled nitrogen with strontium isotopes in the  
365 Nandong underground river system in Yunan, China. *Environ. Sci. Technol.* **43**,  
366 7676–7683 (2009).
- 367 (80) Kelley, C. J., Keller, C. K., Evans, R. D., Orr, C. H., Smith, J. L. & Harlow, B. A.  
368 Nitrate–nitrogen and oxygen isotope ratios for identification of nitrate sources  
369 and dominant nitrogen cycle processes in a tile-drained dryland agricultural  
370 field. *Soil Biol. Biochem.* **57**, 731–738 (2013).
- 371 (81) Knapp, A. N., Hastings, M. G., Sigman, D. M., Lipschultz, F. & Galloway, J. N.  
372 The flux and isotopic composition of reduced and total nitrogen in Bermuda  
373 rain. *Mar. Chem.* **120**, 83–89 (2010).
- 374 (82) Koba, K., Tokuchi, N., Wada, E., Nakajima, T. & Iwatsubo, G. Intermittent  
375 denitrification: the application of a  $^{15}\text{N}$  natural abundance method to a forest  
376 ecosystem. *Geochim. Cosmochim. Ac.* **23**, 5043–5050 (1997).
- 377 (83) Kohzu, A., Imai, A., Nakajima, Y., Komatsu, K., Kawasaki, N. & Satou, T. An  
378 inexpensive auto-injection preprocessing system for  $\text{N}_2\text{O}$  by isotope ratio mass  
379 spectrometer to measure  $\delta^{15}\text{N}$  and  $\delta^{18}\text{O}$  of nitrate. *Radioisotopes* **60**,  
380 231–240 (2011).

- 381 (84) Kojima, K., Sano, S., Kurisu, F. & Furumai, H. Estimation of source contribution  
382 to nitrate loading in road runoff using stable isotope analysis. *Urban Water J.*  
383 **14**, 337–342 (2017).
- 384 (85) Koopmans, C. J., Dam, D. V., Tietema, A. & Verstraten, J. M. Natural <sup>15</sup>N  
385 abundance in two nitrogen saturated forest ecosystems. *Oecologia* **111**,  
386 470–480 (1997).
- 387 (86) Korth, F., Deutsch, B., Frey, C., Moros, C. & Voss, M. Nitrate source  
388 identification in the Baltic sea using its isotopic ratios in combination with a  
389 Bayesian isotope mixing model. *Biogeosciences* **11**, 4913–4924 (2014).
- 390 (87) Lee, K. S., Bong, Y. S., Lee, D., Kim, Y. & Kim, K. Tracing the sources of nitrate  
391 in the Han river watershed in Korea, using  $\delta^{15}\text{N-NO}_3^-$  and  $\delta^{18}\text{O-NO}_3^-$  values.  
392 *Sci. Total Environ.* **395**, 117–124 (2010).
- 393 (88) Leng, Q., Cui, J., Zhou, F., Du, K., Zhang, L. & Fu, C. Wet-only deposition of  
394 atmospheric inorganic nitrogen and associated isotopic characteristics in a  
395 typical mountain area, Southwestern China. *Sci. Total Environ.* **616**, 55–63  
396 (2018).
- 397 (89) Li, R., Ruan, X., Bai, Y., Ma, T. & Liu, C. Effect of wheat-maize straw return on  
398 the fate of nitrate in groundwater in the Huaihe river basin, China. *Sci. Total*  
399 *Environ.* **592**, 78–85 (2017).
- 400 (90) Liang, Y., Xiao, H. Y., Liu, X. Z., Hu, Q. Q., Xie, Y. J., Cao, Y. S. & Ding, X.  
401 H. Carbon and nitrogen stable isotopes tracing nitrogen pollution in major  
402 flooding season in Lake Bang, Lake Poyang Basin. *J. Lake Sci.* **30**, 957–966  
403 (2018).
- 404 (91) Liu, X. Y., Xiao, H. W., Xiao, H. Y., Song, W., Sun, X. C., & Zheng, X. D.  
405 Stable isotope analyses of precipitation nitrogen sources in Guiyang,  
406 Southwestern China. *Environ. Pollut.* **230**, 486–494 (2017).
- 407 (92) Lu, L., Cheng, H., Pu, X., Liu, X. & Cheng, Q. Nitrate behaviors and source  
408 apportionment in an aquatic system from a watershed with intensive  
409 agricultural activities. *Environ. Sci. Proc. Imp.* **17**, 131–144 (2015).
- 410 (93) Mara, P., Mihalopoulos, N., Gogou, A., Daehnke, K., Schlarbaum, T. & Emeis,  
411 K. C. Isotopic composition of nitrate in wet and dry atmospheric deposition on  
412 Crete in the eastern Mediterranean Sea. *Global Biogeochem. Cy.* **23**, GB4002,  
413 doi:10.1029/2008GB003395 (2009).
- 414 (94) Moore, H. Isotopic measurement of atmospheric nitrogen compounds. *Tellus B.*  
415 **26**, 169–174 (1974).
- 416 (95) Moore, H. The isotopic composition of ammonia, nitrogen dioxide and nitrate in  
417 the atmosphere. *Atmos. Environ.* **11**, 1239–1243 (1977).
- 418 (96) Morin, S., Erbland, J., Savarino, J., Domine, F., Bock, J. & Friess, U. An isotopic  
419 view on the connection between photolytic emissions of NO<sub>x</sub>, from the Arctic  
420 snowpack and its oxidation by reactive halogens. *J. Geophys. Res. Atmos.*  
421 **117**(D14), doi:10.1029/2011JD016618 (2012).

- 422 (97) Morin, S., Savarino, J., Frey, M., Yan, N., Bekki, S., Bottenheim, J. W. &  
423 Martins, J. M. F. Tracing the origin and fate of NO<sub>x</sub> in the Arctic atmosphere  
424 using stable isotopes in nitrate. *Science* **322**, 730–732 (2008).
- 425 (98) Mueller, C., Krieg, R., Merz, R. & Kay Knödel. Regional nitrogen dynamics in  
426 the Tereno Bode river catchment, Germany, as constrained by stable isotope  
427 patterns. *Isot. Environ. Healt. S.* **52**, 1–14 (2015).
- 428 (99) Mukotaka, A. A study of nitrogen oxides dynamics between urban atmosphere  
429 and the phyllosphere using triple oxygen isotope. PhD Thesis, Tokyo Institute  
430 of Technology (2014).
- 431 (100) Nanus, L., Campbell, D. H., Lehmann, C. M. B. & Mast, M. A. Spatial and  
432 temporal variation in sources of atmospheric nitrogen deposition in the Rocky  
433 Mountains using nitrogen isotopes. *Atmos. Environ.* **176**, 110–119 (2017).
- 434 (101) Nanus, L., Williams, M. W., Campbell, D. H., Elliott, E. M. & Kendall, C.  
435 Evaluating regional patterns in nitrate sources to watersheds in national parks  
436 of the Rocky Mountains using nitrate isotopes. *Environ. Sci. Technol.* **42**,  
437 6487–6493 (2008).
- 438 (102) Nelson, D. M., Tsunogai, U. & Dong, D. Triple oxygen isotopes indicate  
439 urbanization affects sources of nitrate in wet and dry atmospheric deposition.  
440 *Atmos. Chem. Phys.* **18**, 6381–6392 (2018).
- 441 (103) Novak, M., Suarez, S. P., Gebauer, G., Thoma, M., Buzek, F. & Cejkova, B.  
442 Relationship between nitrogen isotope ratios of NO<sub>3</sub><sup>-</sup> and N<sub>2</sub>O in vertical  
443 porewater profiles through a polluted rain-fed peat bog. *Soil Biol. Biochem.*  
444 **123**, 7–9 (2018).
- 445 (104) Oelmann, Y., Kreuziger, Y., Bol, R. & Wilcke, W. Nitrate leaching in soil:  
446 tracing the NO<sub>3</sub><sup>-</sup> sources with the help of stable N and O isotopes. *Soil Biol.*  
447 *Biochem.* **39**, 3024–3033 (2007).
- 448 (105) Osaka, K., Ohte, N., Koba, K., Yoshimizu, C., Katsuyama, M., Tani, M.,  
449 Tayasu, I. & Nagata, T. Hydrological influences on spatiotemporal variations of  
450 <sup>15</sup>N and <sup>18</sup>O of nitrate in a forested headwater catchment in central Japan:  
451 denitrification plays a critical role in ground water. *J. Geophys. Res. Biogeo.*  
452 **115**, G02021, doi:10.1029/2009JG000977 (2010).
- 453 (106) Panno, S. V., Kelly, W. R., Hackley, K. C., Hwang, H. H. & Martinsek, A. T.  
454 Sources and fate of nitrate in the Illinois river basin, Illinois. *J. Hydrol.* **359**,  
455 174–188 (2008).
- 456 (107) Pardo, L. H., Kendall, C., Pett-Ridge, J. & Chang, C. C. Y. Evaluating the  
457 source of streamwater nitrate using δ<sup>15</sup>N and δ<sup>18</sup>O in nitrate in two watersheds  
458 in New Hampshire, USA. *Hydrol. Process.* **18**, 2699–2712 (2004).
- 459 (108) Piatek, K. B., Mitchell, M. J., Silva, S. R. & Kendall, C. Sources of nitrate in  
460 snowmelt discharge: evidence from water chemistry and stable isotopes of  
461 nitrate. *Water Air Soil Poll.* **165**, 13–35 (2005).

- 462 (109) Pichlmayer, F., Schoner, W., Seibert, P., Stichler, W. & Wagenbach, D. Stable  
463 isotope analysis for characterization of pollutants at high elevation alpine sites.  
464 *Atmos. Environ.* **32**, 4075–4085 (1998).
- 465 (110) Popescu, R., Mimmo, T., Dinca, O. R., Capici, C., Costinel, D. & Sandru, C.  
466 Using stable isotopes in tracing contaminant sources in an industrial area: a  
467 case study on the hydrological basin of the Olt river, Romania. *Sci. Total*  
468 *Environ.* **533**, 17–23 (2015).
- 469 (111) Riha, K. M. The use of stable isotopes to constrain the nitrogen cycle. PhD  
470 Thesis, Purdue University. (2014).
- 471 (112) Rose, L. A., Elliott, E. M. & Adams, M. B. Triple nitrate isotopes indicate  
472 differing nitrate source contributions to streams across a nitrogen saturation  
473 gradient. *Ecosystems*, **18**, 1209–1223 (2015).
- 474 (113) Russell, K. M., Galloway, J. N., Macko, S. A., Moody, J. L. & Scudlark, J. R.  
475 Sources of nitrogen in wet deposition to the Chesapeake Bay Region. *Atmos.*  
476 *Environ.* **32**, 3923–3927 (1998).
- 477 (114) Savard, M. M., Cole, A., Smirnoff, A. & Vet, R.  $\delta^{15}\text{N}$  values of atmospheric N  
478 species simultaneously collected using sector-based samplers distant from  
479 sources-isotopic inheritance and fractionation. *Atmos. Environ.* **162**, 11–22  
480 (2017).
- 481 (115) Savarino, J., Kaiser, J., Morin, S., Sigman, D. M. & Thiemens, M. H. Nitrogen  
482 and oxygen isotopic constraints on the origin of atmospheric nitrate in coastal  
483 Antarctica. *Atmos. Chem. Phys.* **7**, 1925–1945 (2007).
- 484 (116) Schiff, S. L., Devito, K. J., Elgood, R. J., McCrindle, P. M. & Spoelstra, J. Two  
485 adjacent forested catchments: dramatically different  $\text{NO}_3^-$  export. *Water*  
486 *Resour. Res.* **38**, 1292, doi:10.1029/2000WR000170 (2002).
- 487 (117) Schwarz, M. T. & Wilcke, O. W. Stable N isotope composition of nitrate reflects  
488 n transformations during the passage of water through a montane rain forest in  
489 Ecuador. *Biogeochemistry* **102**, 195–208 (2011).
- 490 (118) Sebestyen, S. D., Boyer, E. W., Shanley, J. B., Kendall, C., Doctor, D. H.,  
491 Aiken, G. R. & Ohte, N. Sources, transformations, and hydrological processes  
492 that control stream nitrate and dissolved organic matter concentrations during  
493 snowmelt in an upland forest. *Water Resour. Res.* **44**, 12,  
494 doi:10.1029/2008WR006983 (2008).
- 495 (119) Shi, J., Ohte, N., Tokuchi, N., Imamura, N., Nagayama, M. & Oda, T. Nitrate  
496 isotopic composition reveals nitrogen deposition and transformation dynamics  
497 along the canopy-soil continuum of a suburban forest in Japan. *Rapid*  
498 *Commun. Mass Sp.* **28**, 2539–2549 (2014).
- 499 (120) Smirnoff, A., Savard, M. M., Vet, R. & Simard, M. C. Nitrogen and triple  
500 oxygen isotopes in near-road air samples using chemical conversion and  
501 thermal decomposition. *Rapid Commun. Mass Sp.* **26**, 2791–2804 (2012).

- 502 (121) Spoelstra, J., Schiff, S. L., Elgood, R. J., Semkin, R. G., & Jeffries, D. S.  
503 Tracing the sources of exported nitrate in the Turkey Lakes watershed using  
504  $^{15}\text{N}/^{14}\text{N}$  and  $^{18}\text{O}/^{16}\text{O}$  isotopic ratios. *Ecosystems* **4**, 536–544 (2001).
- 505 (122) Spoelstra, J., Schiff, S. L., Jeffries, D. & Semkin, R. Effect of storage on the  
506 isotopic composition of nitrate in bulk precipitation. *Environ. Sci. Technol.* **38**,  
507 4723–4727 (2004).
- 508 (123) Sun L. Y. Atmospheric nitrogen and phosphorus deposition in Nanjing and  
509 effects of simulated nitrogen deposition on gaseous emissions of soils. PhD  
510 Thesis, Nanjing Agricultural University. (2014). (in Chinese with English  
511 abstract)
- 512 (124) Templer, P. H., Weathers, K. C., Ewing, H. A., Dawson, T. E., Mambelli, S.,  
513 Lindsey, A. M., Webb, J., Boukili, V. K. & Firestone, M. K. Fog as a source of  
514 nitrogen for redwood trees: evidence from fluxes and stable isotopes. *J. Ecol.*  
515 **103**, 1397–1407 (2015).
- 516 (125) Templer, P. H., Weathers, K. C., Lindsey, A., Lenoir, K. & Scott, L.  
517 Atmospheric inputs and nitrogen saturation status in and adjacent to class I  
518 wilderness areas of the Northeastern US. *Oecologia* **177**, 5–15 (2015).
- 519 (126) Ti, C., Wang, X. & Yan, X. Determining  $\delta^{15}\text{N}\text{-NO}_3^-$  values in soil, water, and  
520 air samples by chemical methods. *Environ. Monit. Assess.* **190**, 341,  
521 doi.org/10.1007/s10661-018-6712-5 (2018).
- 522 (127) Tobari, Y., Koba, K., Fukushima, K., Tokuchi, N., Ohte, N., Tateno, R., Toyoda,  
523 S., Yoshioka, T. & Yoshida, N. Contribution of atmospheric nitrate to steam-  
524 water nitrate in Japanese coniferous forests revealed by the oxygen isotope  
525 ratio of nitrate. *Rapid Commun. Mass Sp.* **24**, 1281–1286 (2010).
- 526 (128) Tsunogai, U., Komatsu, D. D., Daita, S., Kazemi, G. A., Nakagawa, F.,  
527 Noguchi, I. & Zhang, J. Tracing the fate of atmospheric nitrate deposited onto a  
528 forest ecosystem in Eastern Asia using  $\Delta^{17}\text{O}$ . *Atmos. Chem. Phys.* **10**,  
529 1809–1820 (2010).
- 530 (129) Tu, Y., Fang, Y., Liu, D., & Pan, Y. modifications to the azide method for  
531 nitrate isotope analysis. *Rapid Commun. Mass Sp.* **30**, 1213–1222 (2016).
- 532 (130) Urumu, T., Takanori, M., Takuya, O., Komatsu, D. D., Fumiko, N. & Yusuke,  
533 O. Accurate and precise quantification of atmospheric nitrate in streams,  
534 draining land of various uses by using triple oxygen isotopes as tracers.  
535 *Biogeosciences* **13**, 3441–3459 (2016).
- 536 (131) Wang, M., Lu, B. H., Wang, J. Q., Zhang, H. W., Guo, L. & Lin, H. Using dual  
537 isotopes and a bayesian isotope mixing model to evaluate nitrate sources of  
538 surface water in a drinking water source watershed, East China. *Water*, **8**, 355,  
539 doi:10.3390/w8080355 (2016).
- 540 (132) Wankel, S. D., Chen, Y., Kendall, C., Post, A. F. & Paytan, A. Sources of  
541 aerosol nitrate to the Gulf of Aqaba: evidence from  $\delta^{15}\text{N}$  and  $\delta^{18}\text{O}$  of nitrate  
542 and trace metal chemistry. *Mar. Chem.* **120**, 90–99 (2010).

- 543 (133) Wasiuta, V., Lafrenière, M. J., Norman, A. L. & Hastings, M. Summer  
544 deposition of sulfate and reactive nitrogen to two alpine valleys in the  
545 Canadian Rocky Mountains. *Atmos. Environ.* **101**, 270–285 (2015).
- 546 (134) Watanabe, K., Kohzu, A., Suda, W., Yamamura, S., Takamatsu, T. &  
547 Takenaka, A. Microbial nitrification in throughfall of a Japanese cedar  
548 associated with archaea from the tree canopy. *SpringerPlus*, **5**, 1596,  
549 doi:10.1186/s40064-016-3286-y (2016).
- 550 (135) Wexler, S. K., Goodale, C. L., McGuire, K. J., Bailey, S. W. & Groffman, P. M.  
551 Isotopic signals of summer denitrification in a northern hardwood forested  
552 catchment. *P. Nat. Acad. Sci.* **111**, 16413–16418 (2014).
- 553 (136) Wu, J. H., Nishijima, Y. & Satake, H. Seasonal variation of  $\delta^{15}\text{N}$  of nitrate ion  
554 found in precipitation at Toyama. *Geochemistry* **42**, 1–11 (2008). (in Japanese  
555 with English abstract)
- 556 (137) Xia, Y., Li, Y., Zhang, X. & Yan, X. Nitrate source apportionment using a  
557 combined dual isotope, chemical and bacterial property, and Bayesian model  
558 approach in river systems. *J. Geophys. Res. Biogeo.* **122**, 2–14,  
559 doi:10.1002/2016JG003447 (2017).
- 560 (138) Xiao, H. Y. & Liu, C. Q. Sources of nitrogen and sulfur in wet deposition at  
561 Guiyang, southwest China. *Atmos. Environ.* **26**, 5121–5130 (2002).
- 562 (139) Xing, M., Liu, W., Wang, Z., & Hu, J. Relationship of nitrate isotopic character  
563 to population density in the loess plateau of Northwest China. *Appl. Geochem.*  
564 **35**, 110–119 (2013).
- 565 (140) Yang, J. Y. T., Hsu, S. C., Dai, M. H., Hsiao, S. S. Y. & Kao, S. J. Isotopic  
566 composition of water-soluble nitrate in bulk atmospheric deposition at Dongsha  
567 Island: sources and implications of external N supply to the northern South  
568 China Sea. *Biogeosciences* **11**, 1833–1846 (2014).
- 569 (141) Yeon, J., Gautam, M. K., Kim, I., Lee, S., Lee, D. & An, H. J. Isotopic  
570 composition of throughfall nitrates in suburban forests with different  
571 vegetations. *Geosci. J.* **19**, 167–175 (2015).
- 572 (142) Yu, L. F., Li, B. W., Zhang, Y. & Wang, Z. W. Natural abundance of nitrogen  
573 isotopes for ammonium nitrogen in rainfall and throughfall at some sites in  
574 China. *Environ. Chem.* **32**, 1599–1603 (2013).
- 575 (143) Yu, Q., Wang, F., Li, X., Yan, W., Li, Y. & Lv, S. Tracking nitrate sources in  
576 the Chaohu lake, China, using the nitrogen and oxygen isotopic approach.  
577 *Environ. Sci. Pollut. Res.* **25**, 19518–19529 (2018).
- 578 (144) Yue, F. J., Li, S. L., Liu, C. Q., Lang, Y. C. & Ding, H. Sources and transport of  
579 nitrate constrained by the isotopic technique in a karst catchment: an example  
580 from Southwest China. *Hydrol. Process.* **29**, 1883–1893 (2015).
- 581 (145) Yue, F. J., Liu, C. Q., Li, S. L., Zhao, Z. Q., Liu, X. L., Ding, H., Liu, B. J. &  
582 Zhong, J. Analysis of  $\delta^{15}\text{N}$  and  $\delta^{18}\text{O}$  to identify nitrate sources and  
583 transformations in Songhua River, Northeast China. *J. Hydrol.* **519**, 329–339  
584 (2014).

- 585 (146) Zhang, Y., Liu, X. J., Fangmeier, A., Goulding, K. T. W. & Zhang, F. S. Nitrogen  
586 inputs and isotopes in precipitation in the North China Plain. *Atmos. Environ.*  
587 **42**, 1436–1448 (2008).
- 588 (147) Zhang, Y., Shi, P., Li, F. D., Wei, A. L., Song, J. X. & Ma, J. J. Quantification  
589 of nitrate sources and fates in rivers in an irrigated agricultural area using  
590 environmental isotopes and a Bayesian isotope mixing model. *Chemosphere.*  
591 **208**, 493–501 (2018).
- 592 (148) Zheng, M., Sheng, Y., Sun, R., Tian, C. & Mortimer, R. J. G. Identification and  
593 quantification of nitrogen in a reservoir, Jiaodong Peninsula, China. *Water*  
594 *Environ. Res.* **89**, 369–377 (2017).



595 **Supplementary Text 2 | Publications of simultaneous observations of HNO<sub>3</sub>, p-**  
596 **NO<sub>3</sub><sup>-</sup>, and NO<sub>2</sub> concentrations in the atmosphere.**

- 597 (149) Elliott, E., Kendall, C., Boyer, E. W., Burns, D. A., Lear, G., Golden, H., Harlin,  
598 K., Bytnerowicz, A., Butler, T. & Glatz, R. Dual nitrate isotopes in dry  
599 deposition: Utility for partitioning NO<sub>x</sub> source contributions to landscape  
600 nitrogen deposition. *J. Geophys. Res. Biogeophys.* **114**, G04020, doi:  
601 10.1029/2008JG000889 (2009).
- 602 (150) Freyer, H. Seasonal variation of <sup>15</sup>N/<sup>14</sup>N ratios in atmospheric nitrate species.  
603 *Tellus B.* **43**, 30–44 (1991).
- 604 (151) Freyer, H., Kley, D., Volz Thomas, A. & Kobel, K. On the interaction of  
605 isotopic exchange processes with photochemical reactions in atmospheric  
606 oxides of nitrogen. *J. Geophys. Res. Atmos.* **98**, 14791–14796 (1993).
- 607 (152) Nelson, D. M., Tsunogai, U., Ding, D., Ohyama, T., Komatsu, D. D.,  
608 Nakagawa, F., Noguchi, I. & Yamaguchi, T. Triple oxygen isotopes indicate  
609 urbanization affects sources of nitrate in wet and dry atmospheric deposition.  
610 *Atmos. Chem. Phys.* **18**, 6381–6392 (2018).
- 611 (153) Savard, M. M., Cole, A., Smirnov, A. & Vet, R. δ<sup>15</sup>N values of atmospheric N  
612 species simultaneously collected using sector-based samplers distant from  
613 sources-isotopic inheritance and fractionation. *Atmos. Environ.* **162**, 11–22  
614 (2017).
- 615 (154) Wojtal, P. K., Miller, D. J., O'Connor, M., Clark, S. C. & Hastings, M. G.  
616 Automated, high-resolution mobile collection system for the nitrogen isotopic  
617 analysis of NO<sub>x</sub>. *J. Vis. Exp.* **118**, e54962, doi:10.3791/54962 (2016).

618 **Supplementary Text 3 | Data sources of observations of HNO<sub>3</sub>, p-NO<sub>3</sub><sup>-</sup>, and NO<sub>2</sub>**  
619 **concentrations in the ambient atmosphere.**

620 (155) [https://emep.int/publ/common\\_publications.html#2019](https://emep.int/publ/common_publications.html#2019)

621 (156) <https://monitoring.eanet.asia/document/public/index>

622 (157) <https://www3.epa.gov/ttn/amtic/supersites.html>

- 623 **Supplementary Text 4 | Publications of observations of ambient  $f_{\text{NO}_2/\text{NO}_x}$  values.**
- 624 (158) Cyrus, J., et al. Variation of  $\text{NO}_2$  and  $\text{NO}_x$  concentrations between and within 36  
625 European study areas: results from the escape study. *Atmos. Environ.* **62**,  
626 374–390 (2012).
- 627 (159) Grundstrom, M., Hak, C., Chen, D., Hallquist, M. & Pleijel, H. Variation and  
628 co-variation of  $\text{PM}_{10}$ , particle number concentration,  $\text{NO}_x$  and  $\text{NO}_2$  in the urban  
629 air-relationships with wind speed, vertical temperature gradient and weather  
630 type. *Atmos. Environ.* **120**, 317–327 (2015).
- 631 (160) <https://monitoring.eanet.asia/document/public/index>
- 632 (161) Matsui, H., Koike, M., Takegawa, N., Kondo, Y., Griffin, R. J., Miyazaki, Y.,  
633 Yokouchi, Y. & Ohara, T. Secondary organic aerosol formation in urban air:  
634 Temporal variations and possible contributions from unidentified  
635 hydrocarbons. *J. Geophys. Res. Atmos.* **114**, D04201,  
636 doi:10.1029/2008JD010164 (2009).
- 637 (162) Mavroidis, I. & Chaloulakou, A. Long-term trends of primary and secondary  
638  $\text{NO}_2$  production in the Athens area. variation of the  $\text{NO}_2/\text{NO}_x$  ratio. *Atmos.*  
639 *Environ.* **45**, 6872–6879 (2011).
- 640 (163) Melkonyan, A. & Kuttler, W. Long-term analysis of  $\text{NO}$ ,  $\text{NO}_2$  and  $\text{O}_3$   
641 concentrations in North Rhine-Westphalia, Germany. *Atmos. Environ.* **60**,  
642 316–326 (2012).
- 643 (164) Rao, M. & George, L. A. Using the  $\text{NO}_2/\text{NO}_x$  Ratio to understand the spatial  
644 heterogeneity of secondary pollutant formation capacity in urban atmospheres.  
645 *Agu Fall Meeting Abstracts*. A33F–3265, (2014).
- 646 (165) Richmond-Bryant, J., Owen, R. C., Graham, S., Snyder, M., McDow, S., Oakes,  
647 M. & Kimbrough, S. Estimation of on-road  $\text{NO}_2$  concentrations,  $\text{NO}_2/\text{NO}_x$   
648 ratios, and related roadway gradients from near-road monitoring data. *Air Qual.*  
649 *Atmos. Heal.* **10**, 611–625 (2017).

650 **Supplementary Text 5 | Publications of ambient  $\delta^{15}\text{N}_{\text{NO}_x}$  observations.**

- 651 (166) Dahal, B. & Hastings, M. G. Technical considerations for the use of passive  
652 samplers to quantify the isotopic composition of  $\text{NO}_x$  and  $\text{NO}_2$  using the  
653 denitrifier method. *Atmos. Environ.* **143**, 60–66 (2016).
- 654 (167) Fibiger, D. L., Hastings, M. G., Lew, A. F., Peltier, R. E. Collection of  $\text{NO}$  and  
655  $\text{NO}_2$  for isotopic analysis of  $\text{NO}_x$  emissions. *Anal. Chem.* **86**, 12115–12121  
656 (2014).
- 657 (168) Savard, M. M., Cole, A., Smirnoff, A., Vet, R.  $\delta^{15}\text{N}$  values of atmospheric N  
658 species simultaneously collected using sector-based samplers distant from  
659 sources-isotopic inheritance and fractionation. *Atmos. Environ.* **162**, 11–22  
660 (2017).
- 661 (169) Wojtal, P. K., Miller, D. J., O'Conner, M., Clark, S. C., Hastings, M. G.  
662 Automated, high-resolution mobile collection system for the nitrogen isotopic  
663 analysis of  $\text{NO}_x$ . *J. Vis. Exp.* **118**, e54962, doi:10.3791/54962 (2016).

- 664 **Supplementary Text 6 | Publications of simultaneous  $\delta^{15}\text{N}$  observations of**  
665  **$\text{HNO}_3$ , p- $\text{NO}_3^-$ , and w- $\text{NO}_3^-$  in the atmosphere.**
- 666 (170) Freyer, H. Seasonal variation of  $^{15}\text{N}/^{14}\text{N}$  ratios in atmospheric nitrate species.  
667 *Tellus B.* **43**, 30–44 (1991).
- 668 (171) Elliott, E., Kendall, C., Boyer, E. W., Burns, D. A., Lear, G., Golden, H., Harlin,  
669 K., Bytnerowicz, A., Butler, T. & Glatz, R. Dual nitrate isotopes in dry  
670 deposition: Utility for partitioning  $\text{NO}_x$  source contributions to landscape  
671 nitrogen deposition. *J. Geophys. Res. Biogeophys.* **114**, G04020, doi:  
672 10.1029/2008JG000888 (2009).
- 673 (172) Nelson, D. M., Tsunogai, U., Ding, D., Ohyama, T., Komatsu, D. D.,  
674 Nakagawa, F., Noguchi, I. & Yamaguchi, T. Triple oxygen isotopes indicate  
675 urbanization affects sources of nitrate in wet and dry atmospheric deposition.  
676 *Atmos. Chem. Phys.* **18**, 6381–6392 (2018).
- 677 (173) Savard, M. M., Cole, A., Smirnov, A. & Vet, R.  $\delta^{15}\text{N}$  values of atmospheric N  
678 species simultaneously collected using sector-based samplers distant from  
679 sources—Isotopic inheritance and fractionation. *Atmos. Environ.* **162**, 11–22  
680 (2017).

681 **Supplementary Text 7 | Publications of ambient  $\delta^{15}\text{N}_{\text{HNO}_3}$  observations.**

- 682 (174) Bell, M. D. Using stable isotopes of nitrogen and oxygen as environmental  
683 indicators of nitrogen deposition in the Sonoran Desert. PhD Thesis, University  
684 of California. (2012).
- 685 (175) Elliott, E. M., Kendall, C., Boyer, E. W., Burns, D. A., Lear, G. G., Golden, H.  
686 E., Harlin, K., Bytnerowicz, A. T., Butler, J. & Glatz, R. Dual nitrate isotopes  
687 in dry deposition: Utility for partitioning  $\text{NO}_x$  source contributions to landscape  
688 nitrogen deposition, *J. Geophys. Res. Atmos.* **114**, G04020,  
689 doi:10.1029/2008JG000889 (2009).
- 690 (176) Felix, J. D. & Elliott, E. M. Isotopic composition of passively collected nitrogen  
691 dioxide emissions: vehicle, soil and livestock source signatures. *Atmos.*  
692 *Environ.* **92**, 359–366 (2014).
- 693 (177) Freyer, H. D. Seasonal variation of  $^{15}\text{N}/^{14}\text{N}$  ratios in atmospheric nitrate species.  
694 *Tellus B.* **43**, 30–40 (1991).
- 695 (178) Kawashima, H. Formation mechanism and source apportionment of ammonium  
696 and nitrate ions in aerosol using nitrogen isotopes. *J. Aerosol Res.* **29**, 110–116  
697 (2014). (in Japanese with English abstract)
- 698 (179) Nelson, D. M., Tsunogai, U. & Dong, D. Triple oxygen isotopes indicate  
699 urbanization affects sources of nitrate in wet and dry atmospheric deposition.  
700 *Atmos. Chem. Phys.* **18**, 6381–6392 (2018).
- 701 (180) Redling, K., Elliott, E., Bain, D. & Sherwell, J. Highway contributions to  
702 reactive nitrogen deposition: tracing the fate of vehicular  $\text{NO}_x$  using stable  
703 isotopes and plant biomonitors. *Biogeochemistry* **116**, 261–274 (2013).
- 704 (181) Savard, M. M., Cole, A., Smirnoff, A. & Vet, R.  $\delta^{15}\text{N}$  values of atmospheric N  
705 species simultaneously collected using sector-based samplers distant from  
706 sources- isotopic inheritance and fractionation. *Atmos. Environ.* **162**, 11–22  
707 (2017).
- 708 (182) Ti, C. P., Wang, X. & Yan, X. Y. Determining  $\delta^{15}\text{N}\text{-NO}_3^-$  values in soil, water,  
709 and air samples by chemical methods. *Environ. Monit. Assess.* **190**, 341,  
710 doi.org/10.1007/s10661-018-6712-5 (2018).

711 **Supplementary Text 8 | Publications of  $\delta^{15}\text{N}_{\text{p-NO}_3}$ - observations.**

- 712 (183) Baker, A. R., Weston, K., Kelly, S. D., Voss, M., Streu, P. & Cape, J. N. Dry and  
713 wet deposition of nutrients from the tropical Atlantic atmosphere: Links to  
714 primary productivity and nitrogen fixation. *Deep-Sea Res.* **54**, 1704–1720  
715 (2007).
- 716 (184) Bell, M. D. Using stable isotopes of nitrogen and oxygen as environmental  
717 indicators of nitrogen deposition in the Sonoran Desert. PhD Thesis, University  
718 of California. (2012).
- 719 (185) Beyn, F., Matthias, V., Aulinger, A. & DaHnke, K. Do N-isotopes in  
720 atmospheric nitrate deposition reflect air pollution levels? *Atmos. Environ.*  
721 **107**, 281–288 (2015).
- 722 (186) Beyn, F., Matthias, V. & Dahnke, K. Changes in atmospheric nitrate deposition  
723 in Germany-An isotopic perspective. *Environ. Pollt.* **194**, 1–10 (2014).
- 724 (187) Chang, Y., Zhang, Y., Tian, C., Zhang, S., Ma, X., Cao, F., Liu, X., Zhang, W.,  
725 Kuhn, T. & Lehmann, M. F. Nitrogen isotope fractionation during gas-to-  
726 particle conversion of  $\text{NO}_x$  to  $\text{NO}_3^-$  in the atmosphere-implications for isotope-  
727 based  $\text{NO}_x$  source apportionment, *Atmos. Chem. Phys.* **18**, 11647–11661  
728 (2018).
- 729 (188) Charles, T. & Garten, J. R. Stable nitrogen isotope ratios in wet and dry nitrate  
730 deposition collected with an artificial tree. *Tellus B.* **48**, 60–64 (1996).
- 731 (189) Gobel, A. R., Altieri, K. E., Peters, A. J., Hastings, M. G. & Sigman, D. M.  
732 Insights into anthropogenic nitrogen deposition to the North Atlantic  
733 investigated using the isotopic composition of aerosol and rainwater nitrate.  
734 *Geophys. Res. Lett.* **40**, 5977–5982 (2013).
- 735 (190) Guha, T., Lin, C. T., Bhattacharya, S. K., Mahajan, A. S., Ou-Yang, C. F., Lan,  
736 Y. P., Hsu, S. C. & Liang, M. C. Isotopic ratios of nitrate in aerosol samples  
737 from Mt. Lulin, a high-altitude station in central Taiwan. *Atmos. Environ.* **154**,  
738 53–69 (2017).
- 739 (191) Hall, S. J., Ogata, E. M., Weintraub, S. R., Baker, M.A., Ehleringer, J. R.,  
740 Czimczik, C. I. & Bowling, D. R. Convergence in nitrogen deposition and  
741 cryptic isotopic variation across urban and agricultural valleys in northern  
742 Utah, *J. Geophys. Res. Biogeo.* **121**, 2340–2355 (2016).
- 743 (192) He, P. Z., Xie, Z. Q., Chi, X. Y., Yu, X. W., Fan, S. D., Kang, H., Liu, C. &  
744 Zhan, H. C. Atmospheric  $\Delta^{17}\text{O}(\text{NO}_3^-)$  reveals nocturnal chemistry dominates  
745 nitrate production in Beijing haze. *Atmos. Chem. Phys.* **18**, 14465–14476  
746 (2018).
- 747 (193) Heaton, T. H. E.  $^{15}\text{N}/^{14}\text{N}$  ratios of nitrate and ammonium in rain at Pretoria,  
748 South Africa. *Atmos. Environ.* **21**, 843–852 (1987).
- 749 (194) Kawashima, H. & Kurahashi, T. Inorganic ion and nitrogen isotopic  
750 compositions of atmospheric aerosols at Yurihonjo, Japan: implications for  
751 nitrogen sources. *Atmos. Environ.* **45**, 6309–6316 (2011).
- 752 (195) Kawashima, H. Formation mechanism and source apportionment of ammonium

- 753 and nitrate ions in aerosol using nitrogen isotopes. *J. Aerosol Res.* **29**, 110–116  
 754 (2014). (in Japanese with English abstract)
- 755 (196) King, M. Z. Evaluating NO<sub>x</sub> sources and oxidation pathways impacting aerosol  
 756 production on the Southern Ute Indian Reservation and Navajo Nation using  
 757 geochemical isotopic analysis. Thesis, Purdue University. (2013)
- 758 (197) Kundu, S., Kawamura, K. & Lee, M. Seasonal variation of the concentrations of  
 759 nitrogenous species and their nitrogen isotopic ratios in aerosols at Gosan, Jeju  
 760 Island: implications for atmospheric processing and source changes of aerosols.  
 761 *J. Geophys. Res. Atmos.* **115**, D20305, doi:10.1029/2009JD013323 (2010).
- 762 (198) Moore, H. The isotopic composition of ammonia, nitrogen dioxide and nitrate  
 763 in the atmosphere. *Atmos. Environ.* **11**, 1239–1243 (1977).
- 764 (199) Morin, S., Erbland, J., Savarino, J., Domine, F., Bock, J., Friess, U., Jacobi, H.-  
 765 W., Sihler, H. & Martins, J. M. F. An isotopic view on the connection between  
 766 photolytic emissions of NO<sub>x</sub> from the Arctic snowpack and its oxidation by  
 767 reactive halogens, *J. Geophys. Res. Atmos.* **117**, D00R08,  
 768 doi:10.1029/2011JD016618 (2012).
- 769 (200) Mukotaka, A. A study of nitrogen oxides dynamics between urban atmosphere  
 770 and the phyllosphere using triple oxygen isotopes. PhD Thesis, Tokyo Institute  
 771 of Technology. (2014)
- 772 (201) Park, Y. M., Park, K. S., Kim, H., Yu, S. M. & Kim, Y. H. Characterizing  
 773 isotopic compositions of TC-C, NO<sub>3</sub><sup>-</sup>-N, and NH<sub>4</sub><sup>+</sup>-N in PM<sub>2.5</sub> in South Korea:  
 774 impact of China's winter heating. *Environ. Pollut.* **233**, 735–744 (2017).
- 775 (202) Proemse, B. C., Mayer, B., Chow, J. C. & Watson, J. G. Isotopic  
 776 characterization of nitrate, ammonium and sulfate in stack PM<sub>2.5</sub> emissions in  
 777 the Athabasca oil sands region, Alberta, Canada. *Atmos. Environ.* **60**, 555–563  
 778 (2012).
- 779 (203) Riha, K. M. The use of stable isotopes to constrain the nitrogen cycle. PhD  
 780 Thesis, Purdue University. (2013).
- 781 (204) Savarino, J., Kaiser, J., Morin, S., Sigman, D. M. & Thiemens, M. H. Nitrogen  
 782 and oxygen isotopic constraints on the origin of atmospheric nitrate in coastal  
 783 Antarctica. *Atmos. Chem. Phys.* **7**, 1925–1945 (2007).
- 784 (205) Savarino, J., Morin, S., Erbland, J., Grannec, F., Patey, M. D., Vicars, W.,  
 785 Alexande, B. & Achterberg, E. P. Isotopic composition of atmospheric nitrate  
 786 in a tropical marine boundary layer. *P. Nat. Acad. Sci.* **110**, 17668–17673  
 787 (2013).
- 788 (206) Tao, Y. L. Study on characteristics and sources of PM<sub>2.5</sub> pollutions in Tianjin  
 789 urban area based on stable isotope technique. Master Thesis, Tianjin  
 790 University. (2017). (in Chinese with English abstract)
- 791 (207) Wankel, S. D., Chen, Y., Kendall, C., Post, A. F. & Paytan, A. Sources of  
 792 aerosol nitrate to the Gulf of Aqaba: evidence from δ<sup>15</sup>N and δ<sup>18</sup>O of nitrate  
 793 and trace metal chemistry. *Mar. Chem.* **120**, 90–99 (2010).
- 794 (208) Xiao, H. W., Xie, L. H., Long, A. M., Ye, F., Pan, Y. P., Li, D. N., Long, Z. H.,



- 795           Chen, L., Xiao, H. Y. & Liu, C. Q. Use of isotopic compositions of nitrate in  
796           tsp to identify sources and chemistry in South China Sea. *Atmos. Environ.* **109**,  
797           70–78 (2015).
- 798   (209) Yang, J. Y. T., Hsu, S. C., Dai, M. H., Hsiao, S. S.Y. & Kao, S. J. Isotopic  
799           composition of water-soluble nitrate in bulk atmospheric deposition at Dongsha  
800           Island: sources and implications of external N supply to the northern South  
801           China Sea. *Biogeosciences* **11**, 1833–1846 (2014).
- 802   (210) Yeatman, S. G., Spokes, L. J., Dennis, P. F. & Jickells, T. D. Can the study of  
803           nitrogen isotopic composition in size-segregated aerosol nitrate and ammonium  
804           be used to investigate atmospheric processing mechanisms? *Atmos. Environ.*  
805           **35**, 1337–1345 (2001).
- 806   (211) Yeatman, S. G., Spokes, L. J., Dennis, P. F. & Jickells, T. D. Comparisons of  
807           aerosol nitrogen isotopic composition at two polluted coastal sites. *Atmos.*  
808           *Environ.* **35**, 1307–1320 (2001).
- 809   (212) Zong, Z., Tan, Y., Wang, X. P., Tian, C. G., Fang, Y. T., Chen, Y. J., Fang, Y.,  
810           Han, G. X., Li, J. & Zhang, G. Assessment and quantification of NO<sub>x</sub> sources  
811           at a regional background site in North China: comparative results from a  
812           Bayesian isotopic mixing model and a positive matrix factorization model.  
813           *Environ. Pollut.* **242**, 1379–1386 (2018).
- 814   (213) Zong, Z., Wang, X., Tian, C., Chen, Y., Fang, Y., Zhang, F., Li, C., Sun, J. Z., Li,  
815           J. & Zhang, G. First assessment of NO<sub>x</sub> sources at a regional background site  
816           in North China using isotopic analysis linked with modeling. *Environ. Sci.*  
817           *Technol.* **51**, 5923–5931 (2017).
